1 **Causal effect of the gut microbiota on the risk of**  
2 **psychiatric disorders and the mediating role**  
3 **of immunophenotypes**

4

5 *Zhisheng Hong<sup>1,2\*</sup>, Ao He<sup>3\*</sup>, Guanglong Huang<sup>1\*</sup>, Xiaofeng Chen<sup>1,4</sup>, Xiaoyu Wang<sup>1,4</sup>,*  
6 *Xiaoyang Li<sup>1,2</sup>, Hailun Chen<sup>1,2</sup>, Xinqi Zhao<sup>1,2</sup>, Ying Xu<sup>1,4</sup>, Yangheng Xu<sup>1,4</sup>, Pei*  
7 *Ouyang<sup>1</sup>, Hai Wang<sup>1</sup>, Jiapeng Deng<sup>1</sup>, Pengyu Chen<sup>1</sup>, Xian Zhang<sup>1#</sup>, Songtao Qi<sup>1#</sup>,*  
8 *Yaomin Li<sup>1#</sup>*

9

10 <sup>1</sup>Department of Neurosurgery, Institute of Brain Disease, Nanfang Hospital, Southern  
11 Medical University, **Guangzhou, China, 510515;**

12 <sup>2</sup>The Second College of Clinical Medicine, Southern Medical University, **Guangzhou,**  
13 **China, 510515;**

14 <sup>3</sup>Central Laboratory of the Second Affiliated Hospital, Kunming Medical University,  
15 **Kunming, China, 650000;**

16 <sup>4</sup>The First College of Clinical Medicine, Southern Medical University, **Guangzhou,**  
17 **China, 510515;**

18 <sup>#</sup>Corresponding authors. Guangzhou Dadao Bei Street 1838#, **Guangzhou, China,**  
19 **510515.** Fax: +86 20 61641806. E-mail addresses: lym712@163.com (Y.L.),  
20 qisongtaonfyy@126.com (S.Q.), zxa@smu.edu.cn (X.Z.).

21 <sup>\*</sup>These authors contributed equally to this work.

## 22 **Abstract**

23 **Background:** Growing evidence indicates a significant correlation between the gut  
24 microbiota, immune system, and psychiatric disorders. Nevertheless, the impacts and  
25 interactions of the gut microbiota and immunophenotypes on psychiatric disorders  
26 remain unclear.

27 **Methods:** We utilized a bidirectional Mendelian randomization (MR) study to  
28 evaluate the causal associations among the gut microbiota, immunophenotypes, and  
29 psychiatric disorders, including attention-deficit/hyperactivity disorder (ADHD),  
30 major depressive disorder (MDD), posttraumatic stress disorder (PTSD),  
31 schizophrenia (SCZ), and Tourette's syndrome (TS). The primary analysis was  
32 conducted using the inverse variance weighted (IVW) method, with several  
33 complementary sensitivity analyses being performed to ensure the reliability of the  
34 results.

35 **Results:** Our study reveals significant causal relationships between 22  
36 immunophenotypes, 15 types of gut microbiota, and various psychiatric disorders. We  
37 further sought to ascertain whether immunophenotypes act as intermediaries in the  
38 pathway from gut microbiota to psychiatric disorders. In particular, three  
39 immunophenotypes were identified that mediate the causal effects of different gut  
40 microbiota on ADHD. Additionally, one immunophenotype was detected to mediate  
41 the causal effects of gut microbiota on PTSD.

42 **Conclusions:** Our study indicates that immunophenotypes partially mediate the  
43 pathway from the gut microbiota to psychiatric disorders.

44 **Keywords:** Gut microbiota; Immunophenotypes; Psychiatric disorders; Mendelian  
45 randomization study; Mediation analysis.

## 46 **1. Introduction**

47 Psychiatric disorders, a kind of life-threatening and debilitating illness with  
48 heterogeneous etiology and complicated pathogenesis, incur a deadweight burden and  
49 have become a leading cause of disability worldwide [1]. Humanitarian emergencies,  
50 pandemics, and fierce competition have significantly increased the incidence of  
51 psychiatric disorders, affecting millions of people worldwide due to psychological  
52 stress [2]. Consequently, it is of the utmost importance to determine probable causal  
53 risk factors for various psychiatric disorders.

54 An increasing number of studies have reported that psychiatric disorders often overlap  
55 genetically and clinically, suggesting that they all share a similar underlying  
56 etiological mechanism [3–5]. Currently, the growing field of immuno-psychiatry  
57 acknowledges the pivotal role of the immune system in maintaining homeostasis and  
58 fortifying the resilience of central nervous system function [6]. Recent evidence  
59 indicates that immune dysregulation is involved in the pathophysiology of various  
60 psychiatric disorders [7–9]. Microglia, the brain's macrophages, have been implicated  
61 in the pathogenesis of multiple psychiatric disorders, including depression, anxiety,  
62 and PTSD, through neuroinflammation [10–12]. Nevertheless, the causal associations  
63 between the immunophenotype and psychiatric disorders remain incomplete,  
64 unsystematic, and unclear.

65 Studies in humans and animals have reported microbial shifts associated with  
66 increased inflammation and alterations in host metabolism [13,14]. These microbes  
67 play a pivotal role in the maturation of the immune response, thereby contributing to  
68 homeostasis [15]. The microbiome profoundly influences peripheral immune  
69 pathways within the gut-brain communication axis, which regulate responses to  
70 neurogenesis [16], neuroinflammation [17], neurological injury [18], and  
71 neurodegeneration [19]. In addition, a substantial body of previous observational  
72 studies has demonstrated that there are discernible differences in the composition of

73 the gut microbiota between healthy individuals and those diagnosed with various  
74 psychiatric disorders [20]. Nevertheless, the intricate nature of the gut microbiota  
75 makes it challenging to achieve a comprehensive and detailed understanding solely  
76 through observational studies.

77 A randomized controlled trial (RCT) is considered the most reliable method for  
78 establishing a causal relationship in the context of scientific research. However, the  
79 implementation of RCTs can be challenging or even unfeasible due to ethical  
80 restrictions. As an alternative, Mendelian randomization is an analytical approach that  
81 utilizes single nucleotide polymorphisms (SNPs) as an instrumental variable (IV) to  
82 investigate the causal relationship between an exposure or a risk factor and a clinically  
83 relevant outcome while minimizing the risk of bias and reverse causation [21]. In this  
84 study, we employed a systematic bidirectional two-sample MR design to  
85 comprehensively investigate the causal effects among the gut microbiome,  
86 immunophenotypes, and various psychiatric disorders. Subsequently, we sought to  
87 determine whether immunophenotypes act as mediators in the pathway from the gut  
88 microbiota to psychiatric disorders.

## 89 **2. Methods**

### 90 **2.1 Study Design**

91 This study comprises three principal phases. The initial phase involves an  
92 examination of the causal effects of 731 immunophenotypes on a range of major  
93 psychiatric disorders. This is followed by an investigation of the causal effects of 207  
94 gut microbiota on psychiatric disorders. Finally, a mediation analysis was conducted  
95 to examine the role of immunophenotypes in the relationship between the gut  
96 microbiota and psychiatric disorders. Furthermore, a reverse MR analysis was  
97 conducted to circumvent the potential effects of reverse causality. The general design  
98 of our study is shown in Figure 1.

99 To determine the unbiased causal effects of exposure on outcomes, MR analysis must  
100 satisfy three fundamental assumptions: (I) relevance assumption: genetic variants are  
101 strongly correlated with exposures; (II) independence assumption: genetic variants are  
102 not associated with any confounding factors of the risk exposure-outcome association;  
103 (III) exclusion restriction assumption: genetic variants do not affect the outcome  
104 except through their potential impact on the exposure of interest [22,23]. This study  
105 followed Strengthening the Reporting of Observational Studies in Epidemiology  
106 (STROBE) Mendelian Randomization Reporting Guidelines [24].

## 107 **2.2 Genome-wide Association Study Data Sources**

108 Summary levels of the immunophenotype data were obtained from the latest GWAS  
109 [25]. The study analyzed a total of 731 immunophenotypes (3,757 Sardinians),  
110 comprising 118 absolute cell counts (AC), 389 median fluorescence intensities (MFI)  
111 reflecting surface antigen levels, 32 morphological parameters (MP), and 192 relative  
112 cell counts (RC). The GWAS data for the gut microbiome were generated from the  
113 Dutch Microbiome Project study, which involved a total of 207 gut microbiota (7,738  
114 European individuals) to evaluate the impact of host genetics on the gut microbiota  
115 [26].

116 The GWAS summary data for ADHD [27], MDD [28], PTSD [29], SCZ [30], and TS  
117 [31] were derived from the Psychiatric Genomics Consortium (PGC). All cohorts  
118 were case-control studies, and cases met the criteria defined in the International  
119 Statistical Classification of Diseases and Related Health Problems-10th Revision  
120 (ICD-10) diagnosis code or medication prescription.

121 All participants were of European ancestry. The original publications contain detailed  
122 diagnostic criteria and methods used to recruit participants for these GWASs. There  
123 was no significant overlap between the GWAS datasets. The characteristics of the  
124 selected GWAS data are listed in Table S1.

## 125 **2.3 Instrumental Variables Selection**

126 First, SNPs significantly associated with the immunophenotypes ( $P < 5 \times 10^{-6}$ ) and the  
127 gut microbiota ( $P < 1 \times 10^{-5}$ ) were selected [32,33]. To guarantee the premise of  
128 independence, IVs were pruned with linkage disequilibrium (LD)  $r^2 > 0.001$  in the  
129 1000 Genomes European data within 10 Mb windows [34]. To compensate for  
130 missing SNPs, those with strong linkage disequilibrium ( $r^2 > 0.8$ ) were utilized [35].  
131 The proportion of variance in the explained phenotype ( $R^2$ ) was calculated to indicate  
132 the power of MR studies [36]. The F-statistic of each IV was calculated using the  
133 formula  $[R^2/(1-R^2)] \times [(N-K-1)/K]$  [37]. To prevent weak instrument bias from  
134 influencing the results, any IV with an F-statistic less than 10 was removed from  
135 consideration. The summary statistics were harmonized, and any mismatched strands  
136 or palindromic SNPs were removed [38]. Additionally, the summary statistics were  
137 aligned to ensure that each genetic variant was associated with the same effect allele.  
138 The research findings are deemed reliable due to the meticulous selection of IVs.

## 139 **2.4 Primary Analysis**

140 Two-sample MR analysis was conducted using the multiplicative random effects  
141 inverse variance weighted approach to evaluate the causal effects of the gut  
142 microbiota and immunophenotype on psychiatric disorders [39]. To evaluate the  
143 robustness of the primary estimates, the MR-Egger and Weighted Median methods  
144 were employed to corroborate the IVW results [40,41]. The coherence in the  
145 orientation of the odds ratio (OR) for IVW, MR-Egger, and weighted median was  
146 deemed essential for the robustness of the findings. The false discovery rate (FDR)  
147 was utilized to adjust for multiple tests, and a significant causal relationship was  
148 established using an FDR-adjusted threshold of  $P < 0.05$  [42]. A P-value of less than  
149 0.05, but above the FDR threshold, was considered indicative of a nominal  
150 association.

## 151 **2.5 Mediation Analysis**

152 Following the bidirectional analysis, the significant causal associations between the  
153 gut microbiota or immunophenotype, and psychiatric disorders were included in the  
154 two-step mediation analysis. Subsequently, the mediation proportions were calculated  
155 according to the following formula:  $(\beta_1 \times \beta_2) / \beta$ , where  $\beta_1$  indicates the impact of the  
156 gut microbiota on mediators,  $\beta_2$  indicates the impact of mediators on psychiatric  
157 disorders, and  $\beta$  indicates the total impact of the gut microbiota on psychiatric  
158 disorders [43]. Standard errors and confidence intervals (CIs) were calculated using  
159 delta methods [44]. Effect estimates are reported as beta values ( $\beta$ ) for the continuous  
160 outcome and ORs for the binary outcome.

## 161 **2.6 Sensitivity Analysis**

162 Cochran's Q statistic was used to assess the heterogeneity across the individual causal  
163 effects [45]. A leave-one-out analysis was conducted to detect outlier instrumental  
164 variables [46]. MR-Egger regression and MR pleiotropy residual sum and outlier  
165 (MR-PRESSO) analyses were performed to evaluate potential horizontal pleiotropy  
166 [47,48]. Outliers identified by the MR-PRESSO outlier test were removed  
167 step-by-step to reduce the effect of horizontal pleiotropy, and a corrected causal result  
168 was recalculated. Furthermore, the Steiger test was employed to negate the potential  
169 bias resulting from reverse causality [49].

## 170 **2.7 Reverse Analysis**

171 To assess the causal effects of psychiatric disorders on the gut microbiota and  
172 immunophenotypes, a backward design was employed, with psychiatric disorders  
173 serving as the exposures and the gut microbiota or immunophenotypes serving as the  
174 outcomes. SNPs significantly associated with ADHD, MDD, and SCZ at the  
175 genome-wide significance level ( $P < 5 \times 10^{-8}$ ) were selected, while a higher cutoff ( $P <$   
176  $1 \times 10^{-5}$ ) was used for PTSD and TS.

177 All analyses were conducted using R statistical software version 4.3.1 (accessed on  
178 October 18, 2023, <https://www.r-project.org/>). MR analysis was performed using the  
179 R-based packages “TwoSampleMR” (v.0.5.9) [50] and “MR\_PRESSO” [51].

## 180 **3. Results**

### 181 **3.1 Instrumental Variables Selection**

182 After performing clumping and linkage disequilibrium pruning, we identified 10,613  
183 SNPs associated with immunophenotypes and 1,962 SNPs related to the gut  
184 microbiota. For the reverse analysis, we selected genetic instruments associated with  
185 psychiatric disorders, with SNPs ranging from 26 to 155. All instrumental variables  
186 exhibited F-statistics exceeding 10, thereby demonstrating a robust association with  
187 exposure phenotypes. Further details on the specific genetic instrumental variables  
188 used to infer causal effects are provided in Table S2.

### 189 **3.2 Causal Effects of Immunophenotypes on Psychiatric Disorders**

190 As shown in Figure 2 and Table S3A, we identified 275 potential causal associations  
191 between immunophenotypes and five psychiatric disorders. Multiple tests identified  
192 22 significant causal associations, as shown in Figure 3. The results of the subsequent  
193 sensitivity analysis were robust to the causal effect analysis, as shown in Tables S3B  
194 and S3C.

195 We identified 54 potential causal associations between immunophenotypes and  
196 ADHD. After adjusting for multiple tests, we investigated five immunophenotypes  
197 that contribute causally to the risk of ADHD from the myeloid cell panel, namely, the  
198 level of HLA DR on CD33<sup>dim</sup> HLA DR<sup>+</sup> CD11b<sup>+</sup> (OR = 1.027, 95% CI 1.019 - 1.035,  
199  $P = 8.41 \times 10^{-11}$ ), the level of CD33 on CD33<sup>dim</sup> HLA DR<sup>+</sup> CD11b<sup>-</sup> (OR = 1.017, 95%  
200 1.008 - 1.026,  $P = 2.31 \times 10^{-4}$ ), the level of CD33 on basophils (OR = 1.026, 95% CI  
201 1.012 - 1.040,  $P = 2.69 \times 10^{-4}$ ), the absolute level of monocytic myeloid-derived  
202 suppressor cells (Mo MDSCs) (OR = 1.049, 95% CI 1.022 - 1.077,  $P = 3.35 \times 10^{-4}$ ),



203 and the level of CD33 on CD33<sup>dim</sup> HLA DR<sup>-</sup> (OR = 1.025, 95% CI 1.011 - 1.039, P =  
204  $5.78 \times 10^{-4}$ ). Furthermore, the genetic increase in the level of herpes virus entry  
205 mediator (HVEM) on effector memory (EM) CD4<sup>+</sup> T cells (OR = 0.965, 95% CI  
206 0.951 - 0.980, P =  $4.04 \times 10^{-6}$ ) was potentially related to a decreased risk of ADHD.  
207 Conversely, the level of CD38 on IgD<sup>+</sup> CD38<sup>br</sup> (OR = 1.050, 95% CI 1.027 - 1.073, P  
208 =  $1.72 \times 10^{-5}$ ) increased the incidence of ADHD. Interestingly, our findings indicate a  
209 protective effect of elevated lymphocyte FSC-A parameters (OR = 0.947, 95% CI  
210 0.919 - 0.975, P =  $2.74 \times 10^{-4}$ ) on the risk of ADHD from a morphological perspective.

211 However, in leave-one-out analyses, we found that rs3865444 would significantly  
212 drive the causal inference of the level of CD33 on CD33<sup>dim</sup> HLA DR<sup>+</sup> CD11b<sup>-</sup>, while  
213 rs190188611 would significantly drive the causal inference of lymphocyte FSC-A  
214 parameters, respectively. Consequently, both phenotypes were excluded from  
215 subsequent mediation analyses, given the robustness of the conclusions.

216 We identified 52 potential causal associations between immunophenotypes and MDD.  
217 After adjusting for multiple tests, we identified the level of CD4 on resting Tregs (OR  
218 = 0.972, 95% CI 0.962 - 0.982, P =  $3.66 \times 10^{-8}$ ) as a significant protective factor  
219 against the risk of MDD.

220 We identified 63 potential causal associations between immunophenotypes and PTSD.  
221 After adjustment for multiple tests, genetic prediction of two immunophenotypes was  
222 associated with a decreased risk of PTSD: the level of CD11c on granulocytes (OR =  
223 0.919, 95% CI 0.884 - 0.954, P =  $1.15 \times 10^{-5}$ ) and the level of CD25 on IgD<sup>+</sup> CD24<sup>-</sup>  
224 (OR = 0.964, 95% CI 0.944 - 0.984, P =  $5.24 \times 10^{-5}$ ). Furthermore, six phenotypes  
225 were identified as being associated with an increased risk of PTSD: the relative  
226 percentage of CD25<sup>++</sup> CD8<sup>br</sup> among T cells (OR = 1.080, 95% CI 1.042 - 1.119, P =  
227  $2.55 \times 10^{-5}$ ), the level of HVEM on EM CD8<sup>br</sup> (OR = 1.050, 95% CI 1.026 - 1.074, P =  
228  $2.58 \times 10^{-5}$ ), the relative percentage of IgD<sup>-</sup> CD24<sup>-</sup> among B cells (OR = 1.040, 95% CI  
229 1.021 - 1.059, P =  $2.97 \times 10^{-5}$ ), the myeloid DC SSC-A parameter (OR = 1.063, 95%  
230 CI 1.031 - 1.096, P =  $9.46 \times 10^{-5}$ ), the relative percentage of basophil among CD33<sup>dim</sup>

231 HLA DR<sup>-</sup> CD66b<sup>-</sup> (OR = 1.061, 95% CI 1.029 - 1.094, P = 1.39×10<sup>-4</sup>), and the level  
232 of IgD on IgD<sup>+</sup> CD38<sup>br</sup> (OR = 1.055, 95% CI 1.024 - 1.086, P = 3.60×10<sup>-4</sup>).

233 However, in leave-one-out analyses, the causal inference of the myeloid DC SSC-A  
234 parameter was significantly driven by rs189299852. Consequently, this phenotype  
235 was excluded from subsequent mediation analyses.

236 We identified 53 potential causal associations between immunophenotype and SCZ.  
237 After adjusting for multiple tests, the relative percentage of CD11c<sup>+</sup> monocytes  
238 among monocytes (OR = 1.087, 95% CI 1.054 - 1.120, P = 8.90×10<sup>-8</sup>), and the  
239 relative percentage of HLA DR<sup>+</sup> CD8<sup>br</sup> among T cells (OR = 1.041, 95% CI 1.020 -  
240 1.062, P = 1.27×10<sup>-4</sup>) were identified as risk factors. Furthermore, the level of CD64  
241 on CD14<sup>+</sup> CD16<sup>+</sup> monocytes (OR = 0.939, 95% CI 0.913 - 0.965, P = 5.74×10<sup>-6</sup>), the  
242 relative percentage of CD28<sup>-</sup> DN (CD4<sup>-</sup>CD8<sup>-</sup>) among T cells (OR = 0.962, 95% CI  
243 0.946 - 0.985, P = 5.81×10<sup>-6</sup>), and the level of CD38 on transitional cells (OR = 0.951,  
244 95% CI 0.926 - 0.976, P = 1.99×10<sup>-4</sup>) were identified as protective factors.

245 We identified 53 potential causal associations between immunophenotype and TS.  
246 Nevertheless, following the application of multiple test correction, no  
247 immunophenotype was found to be significantly associated with TS.

### 248 **3.3 Causal Effects of the Gut Microbiota on Psychiatric Disorders**

249 As shown in Figure 2 and Table S3D, we identified 66 potential causal associations  
250 between the gut microbiota and five psychiatric disorders. Multiple tests identified 14  
251 significant causal associations, as shown in Figure 3. The results of the subsequent  
252 sensitivity analysis were robust to the causal effect analysis, as shown in Tables S3E  
253 and S3F.

254 A total of 19 nominal causal effects of the gut microbiota on ADHD were identified.  
255 After adjustment for the P-value, the MR analysis indicated that the genetic  
256 predictions of *Streptococcus parasanguinis* (OR = 0.964, 95% CI 0.946 - 0.982, P =

257  $8.49 \times 10^{-5}$ ) and *Alistipes indistinctus* (OR = 0.948, 95% CI 0.920 - 0.976, P =  
258  $3.16 \times 10^{-4}$ ) were associated with a decreased risk of ADHD. Conversely,  
259 *Ruminococcus bromii* (OR = 1.110, 95% CI 1.048 - 1.175, P =  $3.90 \times 10^{-4}$ ) and  
260 *Ruminococcus callidus* (OR = 1.063, 95% CI 1.026 - 1.101, P =  $7.14 \times 10^{-4}$ )  
261 significantly increased the incidence of ADHD. Furthermore, *Bacteroides*  
262 *massiliensis* (OR = 1.074, 95% CI 1.032 - 1.118, P =  $4.19 \times 10^{-4}$ ) was potentially  
263 related to a greater risk of ADHD. Interestingly, an unnamed family from the  
264 order *Clostridiales* (OR = 1.102, 95% CI 1.042 - 1.165, P =  $6.91 \times 10^{-4}$ ) was identified  
265 as a risk factor for ADHD.

266 A total of eight nominal causal effects of the gut microbiota on MDD were identified.  
267 After adjustment for the P-value, no gut microbiota was found to be significantly  
268 associated with MDD.

269 Thirteen nominal causal effects of the gut microbiota on PTSD were identified. After  
270 adjustment for the P-value, *S. parasanguinis* (OR = 0.904, 95% CI 0.880 - 0.929, P =  
271  $4.17 \times 10^{-13}$ ) was found to be significantly associated with a decreased risk of PTSD,  
272 similar to that observed for ADHD.

273 A total of five nominal causal effects of the gut microbiota on SCZ were identified.  
274 After adjustment for the P-value, genetic prediction of the family *Ruminococcaceae*  
275 (OR = 0.879, 95% CI 0.832 - 0.928, P =  $3.76 \times 10^{-6}$ ) was associated with a decreased  
276 risk of SCZ. Notably, *R. callidus* (OR = 1.040, 95% CI 1.024 - 1.055, P =  $6.02 \times 10^{-7}$ ),  
277 from the family *Ruminococcaceae*, was determined to be significantly associated with  
278 increased susceptibility to SCZ, similar to that observed for ADHD.

279 A total of 21 nominal causal effects of the gut microbiota on TS were identified. After  
280 adjustment for the P-value, the genetic prediction of four gut microbiota (including  
281 two genera and two species) was found to be associated with an increased risk of TS.  
282 These included *Streptococcus thermophilus* (OR = 1.123, 95% CI 1.070 - 1.178, P =  
283  $2.25 \times 10^{-6}$ ), *Ruminococcaceae bacterium D16* (OR = 1.169, 95% CI 1.064 - 1.285, P =

284  $1.14 \times 10^{-3}$ ), genus *Odoribacter* (OR = 1.440, 95% CI 1.186 - 1.750, P =  $2.38 \times 10^{-4}$ ),  
285 and an unnamed genus from the family *Ruminococcaceae* (OR = 1.175, 95% CI 1.083  
286 - 1.276, P =  $1.13 \times 10^{-4}$ ). Nevertheless, the genus *Barnesiella* (OR = 0.829, 95% CI  
287 0.761 - 0.902, P =  $1.58 \times 10^{-5}$ ), which belongs to the same family (family  
288 *Porphyromonadaceae*) as the genus *Odoribacter*, was demonstrated to exert a  
289 protective effect against TS.

### 290 3.4 Mediation Analysis

291 As shown in Figure 4 and Table S4, the gut microbiota and immunophenotype were  
292 found to exert causal effects on psychiatric disorders, with the immunophenotype  
293 serving as a partial mediator in the pathway from the gut microbiota to ADHD and  
294 PTSD. However, in leave-one-out analyses, the causal inferences of *R. bromii* on the  
295 level of CD33 on basophils and the level of CD33 on CD33<sup>dim</sup> HLA DR<sup>-</sup> were  
296 significantly driven by rs12041621 and rs1884673. Consequently, these phenotypes  
297 were excluded from mediation analysis to prevent the introduction of statistical bias  
298 due to the influence of a single SNP.

299 Significant associations were identified between the genetic prediction of *R. bromii*  
300 and a decreased level of HVEM on EM CD4<sup>+</sup> ( $\beta$  = -0.325, 95% CI -0.557 - -0.093, P  
301 =  $5.95 \times 10^{-3}$ ), mediated 11.04% of the causal effect of *R. bromii* on ADHD.  
302 Furthermore, we observed suggestive evidence indicating that an elevated level of *R.*  
303 *callidus* was associated with a significantly greater level of HLA DR on CD33<sup>dim</sup>  
304 HLA DR<sup>+</sup> CD11b<sup>+</sup> ( $\beta$  = 0.246, 95% CI 0.173 - 0.319, P =  $5.14 \times 10^{-11}$ ), which  
305 mediated 10.60% of the causal effect of *R. callidus* on ADHD. Notably, a potential  
306 association was identified between the genetic prediction of *S. parasanguinis* and a  
307 decreased level of CD38 on IgD<sup>+</sup> CD38<sup>br</sup> ( $\beta$  = -0.132, 95% CI -0.211 - -0.054, P =  
308  $9.20 \times 10^{-4}$ ), which accounted for 17.48% of the causal effect of *S. parasanguinis* on  
309 ADHD. Conversely, the genetic prediction of *S. parasanguinis* was an increase in the  
310 level of CD25 on IgD<sup>+</sup> CD24<sup>-</sup> ( $\beta$  = 0.145, 95% CI 0.067 - 0.224, P =  $3.04 \times 10^{-4}$ ),  
311 which contributed to 5.35% of the causal effect of *S. parasanguinis* on PTSD.

### 312 **3.5 Reverse Analysis**

313 According to the backward analysis, as shown in Tables S5A and S5B, the onset of  
314 ADHD significantly decreased the relative abundance of *Coprococcus catus* ( $\beta =$   
315  $-0.222$ , 95% CI  $-0.311 - -0.133$ ,  $P = 1.04 \times 10^{-6}$ ). Furthermore, we sought to ascertain  
316 whether the previously identified significant causality exhibited reverse interference.  
317 As shown in Tables S5C, S5D and S5E, our findings indicate that reverse causality  
318 was not a potential factor in these instances.

### 319 **3.6 Sensitivity Analysis**

320 The Cochran's Q test indicated the absence of significant heterogeneity. No evidence  
321 of horizontal pleiotropy was identified, as the intercept of MR-Egger did not  
322 significantly deviate from zero. Additionally, no potential instrumental outliers were  
323 detected at the nominal significance level of 0.05 by MR-PRESSO analysis. The  
324 leave-one-out results indicate that no single instrumental variable drove the remaining  
325 causal effects. These results serve to confirm the validity of our analysis and  
326 demonstrate its robustness in avoiding unintentional errors.

## 327 **4. Discussion**

328 This study presents, for the first time, multiple novel potential associations between  
329 genetically predicted gut microbiota or immunophenotypes and psychiatric disorders  
330 using bidirectional MR analysis with mediation analysis. In addition, we identified  
331 multiple potential pathways of immunophenotype-mediated causality between the gut  
332 microbiota and psychiatric disorders. This provides a new direction for understanding  
333 how the gut-brain axis may influence psychiatric disorders.

334 ADHD is a neurodevelopmental disorder that persists, characterized by inattention,  
335 hyperactivity, and impulsivity [52]. The prevalence of ADHD varies across  
336 populations and age groups, and a meta-analysis suggested that ADHD affects 5% of  
337 children and adolescents and 2.5% of adults worldwide [53]. This study demonstrated

338 that *R. callidus* is associated with an increased risk of ADHD, which is mediated by  
339 elevated expression of HLA DR on the CD33<sup>dim</sup> HLA DR<sup>+</sup> CD11b<sup>+</sup> surface. HLA DR  
340 gene region has been implicated in several psychiatric disorders, including  
341 schizophrenia, bipolar disorder, and autism spectrum disorders [54]. Nevertheless,  
342 current research has been unable to identify a correlation between ADHD and HLA.  
343 Further studies are necessary to confirm this hypothesis. Moreover, our findings also  
344 indicate that *R. bromii* may increase the risk of ADHD by reducing the expression of  
345 HVEM on EM CD4<sup>+</sup>, which is regarded as a protective factor for ADHD. However,  
346 few previous studies have suggested this, which may represent a novel perspective  
347 that diverges from the previous belief that *R. bromii* is a probiotic [55]. Notably,  
348 HVEM plays a role in the maintenance of T-cell immune homeostasis [56]. This  
349 phenomenon may be attributed to the diminished coinhibitory effect of HVEM, which  
350 stimulates effector memory T cells to secrete copious quantities of cytokines (e.g.,  
351 IL-17 and IFN- $\gamma$ ) [57,58]. These cytokines trigger neuroinflammation, a process that  
352 could contribute to the etiology of ADHD.

353 This study demonstrated that elevated levels of various myeloid cell phenotypes,  
354 particularly high surface expression of CD33, are significantly and positively  
355 associated with the risk of developing ADHD. CD33 is a molecule of the Siglec  
356 family that is mainly expressed in myeloid cells, including macrophages and dendritic  
357 cells, and is involved in regulating cellular activation, differentiation, and  
358 inflammatory responses [59]. In addition, microglia, a vital subset of immune cells  
359 within the central nervous system, also express CD33 molecules [60]. Synaptic  
360 pruning mediated by microglia involves the elimination of excessive or weak synaptic  
361 connections, thereby strengthening the more important and efficient neural pathways,  
362 which, if their activities are abnormal, can affect neural circuitry development,  
363 leading to ADHD-related symptoms [61,62]. Furthermore, under conditions of focal  
364 brain injury or neuroinflammation, Mo MDSCs can infiltrate the brain and inhibit  
365 neuronal inflammation by suppressing microglia activation, which is triggered by  
366 factors like IFN- $\gamma$ , GM-CSF, and TNF [63,64].

367 Surprisingly, this study revealed that ADHD could decrease the abundance of *C. catus*.  
368 Previous studies have shown that the Mediterranean diet can increase the abundance  
369 of *C. catus* [65]. It was postulated that patients with ADHD may experience appetite  
370 suppression as a side effect of medication or as a consequence of abnormal eating  
371 habits resulting from mood changes associated with the onset of ADHD.  
372 Consequently, this could result in a reduction in the abundance of *C. catus*.  
373 Furthermore, a reduction in the abundance of *C. catus* may result in a decrease in  
374 butyrate production, which plays an important anti-inflammatory role in the central  
375 nervous system [66,67]. This, in turn, may exacerbate ADHD symptoms.  
376 Consequently, fluctuations in the prevalence of *C. catus* can be employed to inform  
377 timely modification of the dietary regimen of ADHD patients, thereby preventing  
378 exacerbation of the disease by establishing a diverse and healthy gut microbiota.

379 PTSD is a debilitating mental disorder with a lifetime prevalence of nearly 8% in the  
380 general population [68]. Those with PTSD experience a constant state of hyperarousal  
381 and fear, which may be associated with abnormal gene expression in the brain and  
382 peripheral blood cells [69]. Furthermore, the coaggregation of PTSD and ADHD  
383 within families implies the presence of shared familial risk factors for these disorders  
384 [70]. In this investigation, *S. parasanguinis* was identified as a co-protective element  
385 against ADHD and PTSD. This effect was found to be mediated by CD38 on IgD<sup>+</sup>  
386 CD38<sup>br</sup> and CD25 on IgD<sup>+</sup> CD24<sup>-</sup>. *S. parasanguinis* is a gram-positive coccus that  
387 typically forms a symbiotic relationship with the human body and has the capacity to  
388 suppress the growth of pathogenic bacteria through the secretion of antibacterial  
389 substances [71,72]. Notably, *S. parasanguinis* is known to colonize the  
390 gastrointestinal tract and stimulate gene expression in Tregs, resulting in the  
391 enhancement of anti-inflammatory cytokine secretion, thus indicating its  
392 immunomodulatory capabilities [73]. Given the established associations between  
393 ADHD and oxidative stress, as well as neuroinflammation, it can be postulated that *S.*  
394 *parasanguinis* might exert an immunosuppressive effect through the downregulation  
395 of CD38, which may play a role in promoting neurodegeneration and inflammatory

396 harm [74,75]. Equally significant is the role of CD25 in suppressing the activation of  
397 self-reactive T cells through mechanisms that are independent of cytokines and reliant  
398 on cell contact to promote immune tolerance [76,77]. *S. parasanguinis* has the  
399 potential to alleviate chronic low-grade inflammation induced by prolonged stress  
400 through the upregulation of CD25, which may contribute to immune regulation,  
401 thereby exerting a protective effect on PTSD. Furthermore, the immunophenotypes  
402 closely linked to the development of PTSD predominantly consist of B lymphocytes.  
403 These cells may enter the prefrontal cortex, insula, amygdala, hippocampus, and other  
404 brain regions either by crossing the blood-brain barrier due to the peripheral release of  
405 proinflammatory cytokines or by directly infiltrating the central nervous system [78].  
406 This process can intensify the manifestations of fear and anxiety. Further investigation  
407 is required to elucidate the potential mechanisms of targeted B-cell intervention for  
408 the alleviation or management of PTSD.

409 SCZ is a severe mental illness characterized by positive symptoms and cognitive  
410 impairment [79]. Growing evidence indicates that the gut microbiota may influence  
411 social behavior, emotion, and cognition via the gut-brain axis, with the potential to  
412 impact the development of SCZ [80]. Our findings suggest that the increased  
413 abundance of *Ruminococcus* may be a protective factor for SCZ. *Ruminococcus*  
414 species are believed to produce butyrate, which can enhance antioxidant capacity and  
415 regulate inflammatory mediators. Surprisingly, we also found that the increased  
416 abundance of *R. callidus* may be a risk factor for SCZ, similar to that observed in  
417 ADHD patients. Furthermore, our study demonstrated a significant correlation  
418 between reduced levels of CD38 in transitional cells and increased susceptibility to  
419 SCZ. This finding is substantiated by animal experiments, which underscore the  
420 crucial involvement of CD38 in neurodevelopmental mechanisms such as  
421 neuropeptide release and social cognition [81]. Moreover, immunophenotypes that  
422 include CD8 molecules may increase susceptibility to SCZ, resembling MDD, which  
423 is characterized by a reduced CD4/CD8 ratio in acute psychosis episodes [82]. The  
424 underlying mechanism remains ambiguous, with speculation suggesting a potential



425 association with systemic inflammation triggered by adaptive immunity. In addition,  
426 various subtypes of monocytes, including the relative percentage of CD11c+  
427 monocytes among monocytes and the level of CD64 on CD14+ CD16+ monocytes,  
428 have been shown to exhibit both detrimental and beneficial effects on SCZ. This  
429 duality in effects may be attributed to the heterogeneity of monocytes circulating in  
430 vivo, which display a combination of proinflammatory and anti-inflammatory traits  
431 [83].

432 MDD is a pervasive mental disorder characterized by persistent low mood, sleep  
433 disturbances, cognitive decline, and other symptoms [84]. There is a plethora of  
434 evidence indicating that neuroinflammation can precipitate cellular immune disorders  
435 and increase the risk of psychiatric disorders, and that Tregs play a pivotal role in  
436 regulating the immune response [85]. MDD typically involves stress activation by the  
437 immune system, leading to the release of stressor-induced circulating  
438 proinflammatory cytokines [86,87]. Consequently, CD4<sup>+</sup>CD25<sup>+</sup> Tregs with  
439 immunomodulatory functions may significantly reduce anxiety-like behaviors by  
440 inhibiting proinflammatory cytokines such as Th1, Th2, and Th17 cells, thereby  
441 alleviating MDD [88]. Importantly, a significant increase in Tregs was previously  
442 observed during antidepressant treatment [89], which strongly supports our  
443 conclusion. In light of the aforementioned studies, we hypothesized that the level of  
444 CD4 on resting Tregs subsets plays an important protective role in the pathogenesis of  
445 MDD by regulating neuroinflammation and reducing oxidative stress.

446 TS is a neurological disorder characterized by repetitive and involuntary movements  
447 and vocalizations, and can be divided into motor tics and vocal tics. These symptoms  
448 often begin in childhood. A significant body of research has demonstrated that the  
449 gut-brain axis plays a pivotal role in the pathophysiology of TS [90]. Fecal microbiota  
450 transplantation (FMT) has been identified as a potential treatment for various  
451 neurological and psychiatric disorders, including TS, by regulating the microbiota  
452 ecology to maintain cytokine balance in the gut lymphoid tissue and reduce the

453 release of proinflammatory factors [91]. *S. thermophilus* is a safe probiotic with  
454 anti-inflammatory, anti-cancer, and antioxidant properties [92]. However, our results  
455 showed that a high abundance of *S. thermophilus* was a risk factor for TS, in contrast  
456 to previous studies. Given the paucity of studies investigating the relationship  
457 between *S. thermophilus* and TS, further research on its mechanism is warranted. In  
458 addition, our study demonstrated that the increased abundance of *R. noname*, *G.*  
459 *odoribacter*, and *R. bacterium D16* may be risk factors for TS. This may be because *R.*  
460 *noname* and *R. bacterium D16* both belong to the *Ruminococcaceae* family, and the  
461 variation in *R. UCG-004* is positively correlated with the anxiety-like behavior of  
462 individuals with ADHD. Importantly, the comorbidity rate of ADHD and TS was  
463 50%, which led us to infer that *G. odoribacter* and *R. bacterium D16* may be common  
464 risk factors for both [93,94]. In fact, according to a study by Wang et al., *G.*  
465 *odoribacter* may interfere with the dopamine metabolic pathway to cause TS  
466 pathogenesis, which is consistent with our conclusion [95]. Finally, we found that  
467 increased abundance of *G. barnesiella* reduced the risk of TS, possibly because *G.*  
468 *barnesiella* is a natural gut microbe involved in competitive inhibition of pathogenic  
469 bacteria and immune regulation, improving cognitive function and thereby  
470 ameliorating TS-related symptoms [96,97].

471 There are several limitations to consider in this study. The current GWAS database  
472 constraints hinder the analysis of data from other ethnic groups, and caution is advised  
473 when interpreting our results in different populations. Moreover, given the inherent  
474 diversity among patients with psychiatric disorders, future research could delve into  
475 these subgroups in more detail. Finally, further prospective controlled trials may be  
476 necessary to investigate the mechanisms underlying the potential roles of recently  
477 discovered gut microbiota and immunophenotypes in psychiatric disorders.

## 478 **5. Conclusion**

479 In summary, our study comprehensively assessed the significant causal relationships  
480 between 22 immunophenotypes, 15 gut microbiota, and five psychiatric disorders.  
481 Furthermore, four potential causal pathways between gut microbiota,  
482 immunophenotypes, and psychiatric disorders were identified. This highlights the  
483 intricate pattern of interactions between the gut microbiota, immune system, and  
484 psychiatric disorders. These findings provide valuable insights for risk assessment and  
485 potential treatment strategies. Consequently, a more comprehensive understanding of  
486 the underlying mechanisms governing these causal relationships could facilitate the  
487 early identification, intervention, and prevention of psychiatric disorders.

## 488 **List of abbreviations**

489 MR: Mendelian randomization

490 ADHD: Attention-deficit/hyperactivity disorder

491 MDD: Major depressive disorder

492 PTSD: Posttraumatic stress disorder

493 SCZ: Schizophrenia

494 TS: Tourette's syndrome

495 IVW: Inverse variance weighted

496 RCT: Randomized controlled trial

497 SNP: Single nucleotide polymorphism

498 IV: Instrumental variable

499 GWAS: Genome-wide association studies

500 LD: Linkage disequilibrium

501 OR: Odds ratio

502 FDR: False discovery rate

503 CI: Confidence intervals

504 MR-PRESSO: MR pleiotropy residual sum and outlier analysis

505 MDSC: myeloid-derived suppressor cells

506 HVEM: Herpes virus entry mediator

## 507 **Supplementary Information**

508 Additional file 1: Supplementary Tables.xlsx.

509 Additional file 2: STROBE-MR checklist.docx.

## 510 **Acknowledgement**

511 The authors would like to express their gratitude to the investigators of the original

512 studies for sharing the GWAS summary statistics.

## 513 **Declarations**

### 514 **Competing interests**

515 The authors declare that they have no competing interests.

### 516 **Ethics approval and consent to participate**

517 All data used in this work are publicly available from studies with relevant participant  
518 consent and ethical approval.

### 519 **Consent for publication**

520 Not applicable.

### 521 **Authors' contributions**

522 Z.H., A.H., and G.H. conceived and designed the project. Z.H., and A.H. drafted the  
523 manuscript. X.C., X.W., X.L., H.C., and X.Z. investigated and collected the data. Z.H.,  
524 Y.X.1, Y.X.2, and P.O. supervised and analyzed the data. A.H., G.H., and H.W.  
525 conducted validation. J.D., and P.C. visualized the results. Y.L., S.Q., and X.Z.  
526 revised the manuscript. All authors carefully revised the manuscript and approved the  
527 version submitted.

### 528 **Funding**

529 This study was supported by the National Natural Science Foundation of China (grant  
530 nos. 82203368); President Foundation of Nanfang Hospital, Southern Medical  
531 University (2023H020); Science and Technology Projects in Guangzhou (grant nos.  
532 202201011008); Natural Science Foundation of Guangdong Province, China  
533 (2023A1515011775); College students' innovative entrepreneurial training plan  
534 program (S202212121090); College students' innovative entrepreneurial training plan  
535 program (S202312121119).

### 536 **Data availability**

537 The datasets analyzed in this study are publicly available summary statistics. The data  
538 can be obtained through cited papers and websites.

### 539 **Code availability**

540 All R scripts applied in this study are available from the authors upon reasonable  
541 request.

542

## 543 References

- 544 [1] Collins PY, Patel V, Joestl SS, March D, Insel TR, Daar AS, et al. Grand challenges in global  
545 mental health. *Nature* 2011;475:27–30. <https://doi.org/10.1038/475027a>.
- 546 [2] Taquet M, Luciano S, Geddes JR, Harrison PJ. Bidirectional associations between  
547 COVID-19 and psychiatric disorder: retrospective cohort studies of 62 354 COVID-19 cases  
548 in the USA. *Lancet Psychiatry* 2021;8:130–40.  
549 [https://doi.org/10.1016/S2215-0366\(20\)30462-4](https://doi.org/10.1016/S2215-0366(20)30462-4).
- 550 [3] Momen NC, Plana-Ripoll O, Agerbo E, Benros ME, Børglum AD, Christensen MK, et al.  
551 Association between Mental Disorders and Subsequent Medical Conditions. *N Engl J Med*  
552 2020;382:1721–31. <https://doi.org/10.1056/NEJMoa1915784>.
- 553 [4] Plana-Ripoll O, Pedersen CB, Holtz Y, Benros ME, Dalsgaard S, De Jonge P, et al.  
554 Exploring Comorbidity Within Mental Disorders Among a Danish National Population.  
555 *JAMA Psychiatry* 2019;76:259. <https://doi.org/10.1001/jamapsychiatry.2018.3658>.
- 556 [5] Kessler RC, Avenevoli S, McLaughlin KA, Green JG, Lakoma MD, Petukhova M, et al.  
557 Lifetime co-morbidity of DSM-IV disorders in the US National Comorbidity Survey  
558 Replication Adolescent Supplement (NCS-A). *Psychol Med* 2012;42:1997–2010.  
559 <https://doi.org/10.1017/S0033291712000025>.
- 560 [6] Pape K, Tamouza R, Leboyer M, Zipp F. Immunoneuropsychiatry — novel perspectives on  
561 brain disorders. *Nat Rev Neurol* 2019;15:317–28.  
562 <https://doi.org/10.1038/s41582-019-0174-4>.
- 563 [7] Sewell MDE, Jiménez-Sánchez L, Shen X, Edmondson-Stait AJ, Green C, Adams MJ, et al.  
564 Associations between major psychiatric disorder polygenic risk scores and blood-based  
565 markers in UK biobank. *Brain Behav Immun* 2021;97:32–41.  
566 <https://doi.org/10.1016/j.bbi.2021.06.002>.
- 567 [8] Kwon S, Cheon SY. Influence of the inflammasome complex on psychiatric disorders:  
568 clinical and preclinical studies. *Expert Opin Ther Targets* 2021;25:897–907.  
569 <https://doi.org/10.1080/14728222.2021.2005027>.
- 570 [9] Zhang R, Song J, Isgren A, Jakobsson J, Blennow K, Sellgren CM, et al. Genome-wide  
571 study of immune biomarkers in cerebrospinal fluid and serum from patients with bipolar  
572 disorder and controls. *Transl Psychiatry* 2020;10:58.  
573 <https://doi.org/10.1038/s41398-020-0737-6>.
- 574 [10] Mondelli V, Vernon AC, Turkheimer F, Dazzan P, Pariante CM. Brain microglia in  
575 psychiatric disorders. *Lancet Psychiatry* 2017;4:563–72.  
576 [https://doi.org/10.1016/S2215-0366\(17\)30101-3](https://doi.org/10.1016/S2215-0366(17)30101-3).
- 577 [11] Smith KL, Kassem MS, Clarke DJ, Kuligowski MP, Bedoya-Pérez MA, Todd SM, et al.  
578 Microglial cell hyper-ramification and neuronal dendritic spine loss in the hippocampus and

- 579 medial prefrontal cortex in a mouse model of PTSD. *Brain Behav Immun* 2019;80:889–99.  
580 <https://doi.org/10.1016/j.bbi.2019.05.042>.
- 581 [12] Kreisel T, Frank MG, Licht T, Reshef R, Ben-Menachem-Zidon O, Baratta MV, et al.  
582 Dynamic microglial alterations underlie stress-induced depressive-like behavior and  
583 suppressed neurogenesis. *Mol Psychiatry* 2014;19:699–709.  
584 <https://doi.org/10.1038/mp.2013.155>.
- 585 [13] Westfall S, Caracci F, Zhao D, Wu Q, Frolinger T, Simon J, et al. Microbiota metabolites  
586 modulate the T helper 17 to regulatory T cell (Th17/Treg) imbalance promoting resilience to  
587 stress-induced anxiety- and depressive-like behaviors. *Brain Behav Immun* 2021;91:350–68.  
588 <https://doi.org/10.1016/j.bbi.2020.10.013>.
- 589 [14] Ling Z, Liu X, Cheng Y, Yan X, Wu S. Gut microbiota and aging. *Crit Rev Food Sci Nutr*  
590 2022;62:3509–34. <https://doi.org/10.1080/10408398.2020.1867054>.
- 591 [15] O’Hara AM, Shanahan F. The gut flora as a forgotten organ. *EMBO Rep* 2006;7:688–93.  
592 <https://doi.org/10.1038/sj.embor.7400731>.
- 593 [16] Humann J, Mann B, Gao G, Moresco P, Ramahi J, Loh LN, et al. Bacterial Peptidoglycan  
594 Traverses the Placenta to Induce Fetal Neuroproliferation and Aberrant Postnatal Behavior.  
595 *Cell Host Microbe* 2016;19:388–99. <https://doi.org/10.1016/j.chom.2016.02.009>.
- 596 [17] Rea K, Dinan TG, Cryan JF. The microbiome: A key regulator of stress and  
597 neuroinflammation. *Neurobiol Stress* 2016;4:23–33.  
598 <https://doi.org/10.1016/j.ynstr.2016.03.001>.
- 599 [18] Lee YK, Menezes JS, Umesaki Y, Mazmanian SK. Proinflammatory T-cell responses to gut  
600 microbiota promote experimental autoimmune encephalomyelitis. *Proc Natl Acad Sci*  
601 2011;108:4615–22. <https://doi.org/10.1073/pnas.1000082107>.
- 602 [19] Seo D, O’Donnell D, Jain N, Ulrich JD, Herz J, Li Y, et al. ApoE isoform– and  
603 microbiota-dependent progression of neurodegeneration in a mouse model of tauopathy.  
604 *Science* 2023;379:eadd1236. <https://doi.org/10.1126/science.add1236>.
- 605 [20] Nikolova VL, Smith MRB, Hall LJ, Cleare AJ, Stone JM, Young AH. Perturbations in Gut  
606 Microbiota Composition in Psychiatric Disorders: A Review and Meta-analysis. *JAMA*  
607 *Psychiatry* 2021;78:1343. <https://doi.org/10.1001/jamapsychiatry.2021.2573>.
- 608 [21] Sekula P, Del Greco M F, Pattaro C, Köttgen A. Mendelian Randomization as an Approach  
609 to Assess Causality Using Observational Data. *J Am Soc Nephrol* 2016;27:3253–65.  
610 <https://doi.org/10.1681/ASN.2016010098>.
- 611 [22] Emdin CA, Khera AV, Kathiresan S. Mendelian Randomization. *JAMA* 2017;318:1925.  
612 <https://doi.org/10.1001/jama.2017.17219>.
- 613 [23] Larsson SC, Butterworth AS, Burgess S. Mendelian randomization for cardiovascular  
614 diseases: principles and applications. *Eur Heart J* 2023;44:4913–24.  
615 <https://doi.org/10.1093/eurheartj/ehad736>.
- 616 [24] Skrivankova VW, Richmond RC, Woolf BAR, Yarmolinsky J, Davies NM, Swanson SA, et al.  
617 Strengthening the Reporting of Observational Studies in Epidemiology Using Mendelian  
618 Randomization: The STROBE-MR Statement. *JAMA* 2021;326:1614.  
619 <https://doi.org/10.1001/jama.2021.18236>.
- 620 [25] Orrù V, Steri M, Sidore C, Marongiu M, Serra V, Olla S, et al. Complex genetic signatures in  
621 immune cells underlie autoimmunity and inform therapy. *Nat Genet* 2020;52:1036–45.  
622 <https://doi.org/10.1038/s41588-020-0684-4>.

- 623** [26] Lopera-Maya EA, Kurilshikov A, Van Der Graaf A, Hu S, Andreu-Sánchez S, Chen L, et al.  
**624** Effect of host genetics on the gut microbiome in 7,738 participants of the Dutch Microbiome  
**625** Project. *Nat Genet* 2022;54:143–51. <https://doi.org/10.1038/s41588-021-00992-y>.
- 626** [27] Demontis D, Walters GB, Athanasiadis G, Walters R, Therrien K, Nielsen TT, et al.  
**627** Genome-wide analyses of ADHD identify 27 risk loci, refine the genetic architecture and  
**628** implicate several cognitive domains. *Nat Genet* 2023;55:198–208.  
**629** <https://doi.org/10.1038/s41588-022-01285-8>.
- 630** [28] Howard DM, Adams MJ, Clarke T-K, Hafferty JD, Gibson J, Shiralil M, et al. Genome-wide  
**631** meta-analysis of depression identifies 102 independent variants and highlights the  
**632** importance of the prefrontal brain regions. *Nat Neurosci* 2019;22:343–52.  
**633** <https://doi.org/10.1038/s41593-018-0326-7>.
- 634** [29] Nievergelt CM, Maihofer AX, Klengel T, Atkinson EG, Chen C-Y, Choi KW, et al.  
**635** International meta-analysis of PTSD genome-wide association studies identifies sex- and  
**636** ancestry-specific genetic risk loci. *Nat Commun* 2019;10:4558.  
**637** <https://doi.org/10.1038/s41467-019-12576-w>.
- 638** [30] Trubetskoy V, Pardiñas AF, Qi T, Panagiotaropoulou G, Awasthi S, Bigdeli TB, et al.  
**639** Mapping genomic loci implicates genes and synaptic biology in schizophrenia. *Nature*  
**640** 2022;604:502–8. <https://doi.org/10.1038/s41586-022-04434-5>.
- 641** [31] Anorexia Nervosa Genetics Initiative, Eating Disorders Working Group of the Psychiatric  
**642** Genomics Consortium, Watson HJ, Yilmaz Z, Thornton LM, Hübel C, et al. Genome-wide  
**643** association study identifies eight risk loci and implicates metabo-psychiatric origins for  
**644** anorexia nervosa. *Nat Genet* 2019;51:1207–14. <https://doi.org/10.1038/s41588-019-0439-2>.
- 645** [32] Shen H-H, Zhang Y-Y, Wang X-Y, Wang C-J, Wang Y, Ye J-F, et al. Potential Causal  
**646** Association between Plasma Metabolites, Immunophenotypes, and Female Reproductive  
**647** Disorders: A Two-Sample Mendelian Randomization Analysis. *Biomolecules* 2024;14:116.  
**648** <https://doi.org/10.3390/biom14010116>.
- 649** [33] Ji D, Chen W-Z, Zhang L, Zhang Z-H, Chen L-J. Gut microbiota, circulating cytokines and  
**650** dementia: a Mendelian randomization study. *J Neuroinflammation* 2024;21:2.  
**651** <https://doi.org/10.1186/s12974-023-02999-0>.
- 652** [34] The 1000 Genomes Project Consortium, Corresponding authors, Auton A, Abecasis GR,  
**653** Steering committee, Altshuler DM, et al. A global reference for human genetic variation.  
**654** *Nature* 2015;526:68–74. <https://doi.org/10.1038/nature15393>.
- 655** [35] Guo B, Wang C, Zhu Y, Liu Z, Long H, Ruan Z, et al. Causal associations of brain structure  
**656** with bone mineral density: a large-scale genetic correlation study. *Bone Res* 2023;11:37.  
**657** <https://doi.org/10.1038/s41413-023-00270-z>.
- 658** [36] Tang M, Wang T, Zhang X. A review of SNP heritability estimation methods. *Brief*  
**659** *Bioinform* 2022;23:bbac067. <https://doi.org/10.1093/bib/bbac067>.
- 660** [37] Burgess S, Thompson SG, CRP CHD Genetics Collaboration. Avoiding bias from weak  
**661** instruments in Mendelian randomization studies. *Int J Epidemiol* 2011;40:755–64.  
**662** <https://doi.org/10.1093/ije/dyr036>.
- 663** [38] Hemani G, Zheng J, Elsworth B, Wade KH, Haberland V, Baird D, et al. The MR-Base  
**664** platform supports systematic causal inference across the human phenome. *eLife*  
**665** 2018;7:e34408. <https://doi.org/10.7554/eLife.34408>.
- 666** [39] Slob EAW, Burgess S. A comparison of robust Mendelian randomization methods using



- 667 summary data. *Genet Epidemiol* 2020;44:313–29. <https://doi.org/10.1002/gepi.22295>.
- 668 [40] Bowden J, Davey Smith G, Burgess S. Mendelian randomization with invalid instruments:  
669 effect estimation and bias detection through Egger regression. *Int J Epidemiol*  
670 2015;44:512–25. <https://doi.org/10.1093/ije/dyv080>.
- 671 [41] Bowden J, Davey Smith G, Haycock PC, Burgess S. Consistent Estimation in Mendelian  
672 Randomization with Some Invalid Instruments Using a Weighted Median Estimator. *Genet*  
673 *Epidemiol* 2016;40:304–14. <https://doi.org/10.1002/gepi.21965>.
- 674 [42] Glickman ME, Rao SR, Schultz MR. False discovery rate control is a recommended  
675 alternative to Bonferroni-type adjustments in health studies. *J Clin Epidemiol*  
676 2014;67:850–7. <https://doi.org/10.1016/j.jclinepi.2014.03.012>.
- 677 [43] Ji D, Chen W-Z, Zhang L, Zhang Z-H, Chen L-J. Gut microbiota, circulating cytokines and  
678 dementia: a Mendelian randomization study. *J Neuroinflammation* 2024;21:2.  
679 <https://doi.org/10.1186/s12974-023-02999-0>.
- 680 [44] Wang Q, Dai H, Hou T, Hou Y, Wang T, Lin H, et al. Dissecting Causal Relationships  
681 Between Gut Microbiota, Blood Metabolites, and Stroke: A Mendelian Randomization  
682 Study. *J Stroke* 2023;25:350–60. <https://doi.org/10.5853/jos.2023.00381>.
- 683 [45] Kulinskaya E, Dollinger MB, Bjørkestøl K. On the moments of Cochran’s Q statistic under  
684 the null hypothesis, with application to the meta-analysis of risk difference. *Res Synth*  
685 *Methods* 2020;11:920–920. <https://doi.org/10.1002/jrsm.1446>.
- 686 [46] Burgess S, Bowden J, Fall T, Ingelsson E, Thompson SG. Sensitivity Analyses for Robust  
687 Causal Inference from Mendelian Randomization Analyses with Multiple Genetic Variants.  
688 *Epidemiology* 2017;28:30–42. <https://doi.org/10.1097/EDE.0000000000000559>.
- 689 [47] Burgess S, Thompson SG. Interpreting findings from Mendelian randomization using the  
690 MR-Egger method. *Eur J Epidemiol* 2017;32:377–89.  
691 <https://doi.org/10.1007/s10654-017-0255-x>.
- 692 [48] Verbanck M, Chen C-Y, Neale B, Do R. Detection of widespread horizontal pleiotropy in  
693 causal relationships inferred from Mendelian randomization between complex traits and  
694 diseases. *Nat Genet* 2018;50:693–8. <https://doi.org/10.1038/s41588-018-0099-7>.
- 695 [49] Hemani G, Tilling K, Davey Smith G. Orienting the causal relationship between imprecisely  
696 measured traits using GWAS summary data. *PLOS Genet* 2017;13:e1007081.  
697 <https://doi.org/10.1371/journal.pgen.1007081>.
- 698 [50] Hemani G, Zheng J, Elsworth B, Wade KH, Haberland V, Baird D, et al. The MR-Base  
699 platform supports systematic causal inference across the human phenome. *eLife*  
700 2018;7:e34408. <https://doi.org/10.7554/eLife.34408>.
- 701 [51] Verbanck M, Chen C-Y, Neale B, Do R. Detection of widespread horizontal pleiotropy in  
702 causal relationships inferred from Mendelian randomization between complex traits and  
703 diseases. *Nat Genet* 2018;50:693–8. <https://doi.org/10.1038/s41588-018-0099-7>.
- 704 [52] Park JH. Potential Inflammatory Biomarker in Patients with Attention Deficit Hyperactivity  
705 Disorder. *Int J Mol Sci* 2022;23:13054. <https://doi.org/10.3390/ijms232113054>.
- 706 [53] Faraone SV, Asherson P, Banaschewski T, Biederman J, Buitelaar JK, Ramos-Quiroga JA, et  
707 al. Attention-deficit/hyperactivity disorder. *Nat Rev Dis Primer* 2015;1:15020.  
708 <https://doi.org/10.1038/nrdp.2015.20>.
- 709 [54] Tamouza R, Krishnamoorthy R, Leboyer M. Understanding the genetic contribution of the  
710 human leukocyte antigen system to common major psychiatric disorders in a world

- 711 pandemic context. *Brain Behav Immun* 2021;91:731–9.  
712 <https://doi.org/10.1016/j.bbi.2020.09.033>.
- 713 [55] Van De Wouw M, Boehme M, Lyte JM, Wiley N, Strain C, O’Sullivan O, et al. Short-chain  
714 fatty acids: microbial metabolites that alleviate stress-induced brain–gut axis alterations. *J*  
715 *Physiol* 2018;596:4923–44. <https://doi.org/10.1113/JP276431>.
- 716 [56] Wang Y, Subudhi SK, Anders RA, Lo J, Sun Y, Blink S, et al. The role of herpesvirus entry  
717 mediator as a negative regulator of T cell-mediated responses. *J Clin Invest* 2005;115:711–7.  
718 <https://doi.org/10.1172/JCI200522982>.
- 719 [57] Kaech SM, Wherry EJ, Ahmed R. Effector and memory T-cell differentiation: implications  
720 for vaccine development. *Nat Rev Immunol* 2002;2:251–62. <https://doi.org/10.1038/nri778>.
- 721 [58] Jain A, Song R, Wakeland EK, Pasare C. T cell-intrinsic IL-1R signaling licenses effector  
722 cytokine production by memory CD4 T cells. *Nat Commun* 2018;9:3185.  
723 <https://doi.org/10.1038/s41467-018-05489-7>.
- 724 [59] Freeman S, Kelm S, Barber E, Crocker P. Characterization of CD33 as a new member of the  
725 sialoadhesin family of cellular interaction molecules. *Blood* 1995;85:2005–12.  
726 <https://doi.org/10.1182/blood.V85.8.2005.bloodjournal8582005>.
- 727 [60] Crocker PR, Paulson JC, Varki A. Siglecs and their roles in the immune system. *Nat Rev*  
728 *Immunol* 2007;7:255–66. <https://doi.org/10.1038/nri2056>.
- 729 [61] Lukens JR, Eyo UB. Microglia and Neurodevelopmental Disorders. *Annu Rev Neurosci*  
730 2022;45:425–45. <https://doi.org/10.1146/annurev-neuro-110920-023056>.
- 731 [62] Mordelt A, De Witte LD. Microglia-mediated synaptic pruning as a key deficit in  
732 neurodevelopmental disorders: Hype or hope? *Curr Opin Neurobiol* 2023;79:102674.  
733 <https://doi.org/10.1016/j.conb.2022.102674>.
- 734 [63] Ge Y, Cheng D, Jia Q, Xiong H, Zhang J. Mechanisms Underlying the Role of  
735 Myeloid-Derived Suppressor Cells in Clinical Diseases: Good or Bad. *Immune Netw*  
736 2021;21:e21. <https://doi.org/10.4110/in.2021.21.e21>.
- 737 [64] Melero-Jerez C, Ortega MC, Molin el-Vel azquez V, Clemente D. Myeloid derived suppressor  
738 cells in inflammatory conditions of the central nervous system. *Biochim Biophys Acta BBA*  
739 *- Mol Basis Dis* 2016;1862:368–80. <https://doi.org/10.1016/j.bbadis.2015.10.015>.
- 740 [65] Newman TM, Shively CA, Register TC, Appt SE, Yadav H, Colwell RR, et al. Diet, obesity,  
741 and the gut microbiome as determinants modulating metabolic outcomes in a non-human  
742 primate model. *Microbiome* 2021;9:100. <https://doi.org/10.1186/s40168-021-01069-y>.
- 743 [66] Reichardt N, Duncan SH, Young P, Belenguer A, McWilliam Leitch C, Scott KP, et al.  
744 Phylogenetic distribution of three pathways for propionate production within the human gut  
745 microbiota. *ISME J* 2014;8:1323–35. <https://doi.org/10.1038/ismej.2014.14>.
- 746 [67] Notting F, Pirovano W, Sybesma W, Kort R. The butyrate-producing and spore-forming  
747 bacterial genus *Coproccoccus* as a potential biomarker for neurological disorders. *Gut*  
748 *Microbiome* 2023;4:e16. <https://doi.org/10.1017/gmb.2023.14>.
- 749 [68] Shalev A, Liberzon I, Marmar C. Post-Traumatic Stress Disorder. *N Engl J Med*  
750 2017;376:2459–69. <https://doi.org/10.1056/NEJMra1612499>.
- 751 [69] Girgenti MJ, Duman RS. Transcriptome Alterations in Posttraumatic Stress Disorder. *Biol*  
752 *Psychiatry* 2018;83:840–8. <https://doi.org/10.1016/j.biopsych.2017.09.023>.
- 753 [70] Antshel KM, Kaul P, Biederman J, Spencer TJ, Hier BO, Hendricks K, et al. Posttraumatic  
754 Stress Disorder in Adult Attention-Deficit/Hyperactivity Disorder: Clinical Features and

- 755 Familial Transmission. *J Clin Psychiatry* 2013;74:e197–204.  
756 <https://doi.org/10.4088/JCP.12m07698>.
- 757 [71] Herrero ER, Slomka V, Bernaerts K, Boon N, Hernandez-Sanabria E, Passoni BB, et al.  
758 Antimicrobial effects of commensal oral species are regulated by environmental factors. *J*  
759 *Dent* 2016;47:23–33. <https://doi.org/10.1016/j.jdent.2016.02.007>.
- 760 [72] Garnett JA, Simpson PJ, Taylor J, Benjamin SV, Tagliaferri C, Cota E, et al. Structural  
761 insight into the role of *Streptococcus parasanguinis* Fap1 within oral biofilm formation.  
762 *Biochem Biophys Res Commun* 2012;417:421–6.  
763 <https://doi.org/10.1016/j.bbrc.2011.11.131>.
- 764 [73] Li S, Li N, Wang C, Zhao Y, Cao J, Li X, et al. Gut Microbiota and Immune Modulatory  
765 Properties of Human Breast Milk *Streptococcus salivarius* and *S. parasanguinis* Strains.  
766 *Front Nutr* 2022;9:798403. <https://doi.org/10.3389/fnut.2022.798403>.
- 767 [74] Bozzatello P, De Rosa ML, Rocca P, Bellino S. Effects of Omega 3 Fatty Acids on Main  
768 Dimensions of Psychopathology. *Int J Mol Sci* 2020;21:6042.  
769 <https://doi.org/10.3390/ijms21176042>.
- 770 [75] Guerreiro S, Privat A-L, Bressac L, Toulorge D. CD38 in Neurodegeneration and  
771 Neuroinflammation. *Cells* 2020;9:471. <https://doi.org/10.3390/cells9020471>.
- 772 [76] Zhang X. IL-10 is involved in the suppression of experimental autoimmune  
773 encephalomyelitis by CD25+CD4+ regulatory T cells. *Int Immunol* 2004;16:249–56.  
774 <https://doi.org/10.1093/intimm/dxh029>.
- 775 [77] Thornton AM, Shevach EM. CD4+CD25+ Immunoregulatory T Cells Suppress Polyclonal T  
776 Cell Activation In Vitro by Inhibiting Interleukin 2 Production. *J Exp Med* 1998;188:287–96.  
777 <https://doi.org/10.1084/jem.188.2.287>.
- 778 [78] Michopoulos V, Powers A, Gillespie CF, Ressler KJ, Jovanovic T. Inflammation in Fear- and  
779 Anxiety-Based Disorders: PTSD, GAD, and Beyond. *Neuropsychopharmacology*  
780 2017;42:254–70. <https://doi.org/10.1038/npp.2016.146>.
- 781 [79] Kahn RS, Sommer IE, Murray RM, Meyer-Lindenberg A, Weinberger DR, Cannon TD, et al.  
782 Schizophrenia. *Nat Rev Dis Primer* 2015;1:15067. <https://doi.org/10.1038/nrdp.2015.67>.
- 783 [80] Liu JCW, Gorbovskaia I, Hahn MK, Müller DJ. The Gut Microbiome in Schizophrenia and  
784 the Potential Benefits of Prebiotic and Probiotic Treatment. *Nutrients* 2021;13:1152.  
785 <https://doi.org/10.3390/nu13041152>.
- 786 [81] Jin D, Liu H-X, Hirai H, Torashima T, Nagai T, Lopatina O, et al. CD38 is critical for social  
787 behaviour by regulating oxytocin secretion. *Nature* 2007;446:41–5.  
788 <https://doi.org/10.1038/nature05526>.
- 789 [82] Steiner J, Jacobs R, Panteli B, Brauner M, Schiltz K, Bahn S, et al. Acute schizophrenia is  
790 accompanied by reduced T cell and increased B cell immunity. *Eur Arch Psychiatry Clin*  
791 *Neurosci* 2010;260:509–18. <https://doi.org/10.1007/s00406-010-0098-x>.
- 792 [83] Melbourne JK, Rosen C, Chase KA, Feiner B, Sharma RP. Monocyte Transcriptional  
793 Profiling Highlights a Shift in Immune Signatures Over the Course of Illness in  
794 Schizophrenia. *Front Psychiatry* 2021;12:649494.  
795 <https://doi.org/10.3389/fpsy.2021.649494>.
- 796 [84] Schramm E, Klein DN, Elsaesser M, Furukawa TA, Domschke K. Review of dysthymia and  
797 persistent depressive disorder: history, correlates, and clinical implications. *Lancet*  
798 *Psychiatry* 2020;7:801–12. [https://doi.org/10.1016/S2215-0366\(20\)30099-7](https://doi.org/10.1016/S2215-0366(20)30099-7).

- 799 [85] Gao X, Tang Y, Kong L, Fan Y, Wang C, Wang R. Treg cell: Critical role of regulatory  
800 T-cells in depression. *Pharmacol Res* 2023;195:106893.  
801 <https://doi.org/10.1016/j.phrs.2023.106893>.
- 802 [86] Schiepers OJG, Wichers MC, Maes M. Cytokines and major depression. *Prog*  
803 *Neuropsychopharmacol Biol Psychiatry* 2005;29:201–17.  
804 <https://doi.org/10.1016/j.pnpbp.2004.11.003>.
- 805 [87] Schlatter J, Ortuño F, Cervera-Enguix S. Lymphocyte subsets and lymphokine production in  
806 patients with melancholic versus nonmelancholic depression. *Psychiatry Res*  
807 2004;128:259–65. <https://doi.org/10.1016/j.psychres.2004.06.004>.
- 808 [88] Gao X, Tang Y, Kong L, Fan Y, Wang C, Wang R. Treg cell: Critical role of regulatory  
809 T-cells in depression. *Pharmacol Res* 2023;195:106893.  
810 <https://doi.org/10.1016/j.phrs.2023.106893>.
- 811 [89] Grosse L, Carvalho LA, Birkenhager TK, Hoogendijk WJ, Kushner SA, Drexhage HA, et al.  
812 Circulating cytotoxic T cells and natural killer cells as potential predictors for antidepressant  
813 response in melancholic depression. Restoration of T regulatory cell populations after  
814 antidepressant therapy. *Psychopharmacology (Berl)* 2016;233:1679–88.  
815 <https://doi.org/10.1007/s00213-015-3943-9>.
- 816 [90] Geng J, Liu C, Xu J, Wang X, Li X. Potential relationship between Tourette syndrome and  
817 gut microbiome. *J Pediatr (Rio J)* 2023;99:11–6. <https://doi.org/10.1016/j.jpmed.2022.06.002>.
- 818 [91] Li H, Wang Y, Zhao C, Liu J, Zhang L, Li A. Fecal transplantation can alleviate tic severity  
819 in a Tourette syndrome mouse model by modulating intestinal flora and promoting serotonin  
820 secretion. *Chin Med J (Engl)* 2022;135:707–13.  
821 <https://doi.org/10.1097/CM9.0000000000001885>.
- 822 [92] Martinović A, Cocuzzi R, Arioli S, Mora D. *Streptococcus thermophilus*: To Survive, or Not  
823 to Survive the Gastrointestinal Tract, That Is the Question! *Nutrients* 2020;12:2175.  
824 <https://doi.org/10.3390/nu12082175>.
- 825 [93] Khalifa N, Von Knorring A-L. Psychopathology in a Swedish Population of School Children  
826 With Tic Disorders. *J Am Acad Child Adolesc Psychiatry* 2006;45:1346–53.  
827 <https://doi.org/10.1097/01.chi.0000251210.98749.83>.
- 828 [94] Freeman RD, Tourette Syndrome International Database Consortium. Tic disorders and  
829 ADHD: answers from a world-wide clinical dataset on Tourette syndrome. *Eur Child*  
830 *Adolesc Psychiatry* 2007;16:15–23. <https://doi.org/10.1007/s00787-007-1003-7>.
- 831 [95] Wang Y, Xu H, Jing M, Hu X, Wang J, Hua Y. Gut Microbiome Composition Abnormalities  
832 Determined Using High-Throughput Sequencing in Children With Tic Disorder. *Front*  
833 *Pediatr* 2022;10:831944. <https://doi.org/10.3389/fped.2022.831944>.
- 834 [96] Fongang B, Satizabal C, Kautz TF, Wadop YN, Muhammad JAS, Vasquez E, et al. Cerebral  
835 small vessel disease burden is associated with decreased abundance of gut *Barnesiella*  
836 *intestinihominis* bacterium in the Framingham Heart Study. *Sci Rep* 2023;13:13622.  
837 <https://doi.org/10.1038/s41598-023-40872-5>.
- 838 [97] Meyer K, Lulla A, Debroy K, Shikany JM, Yaffe K, Meirelles O, et al. Association of the  
839 Gut Microbiota With Cognitive Function in Midlife. *JAMA Netw Open* 2022;5:e2143941.  
840 <https://doi.org/10.1001/jamanetworkopen.2021.43941>.

842

843 **Figures**

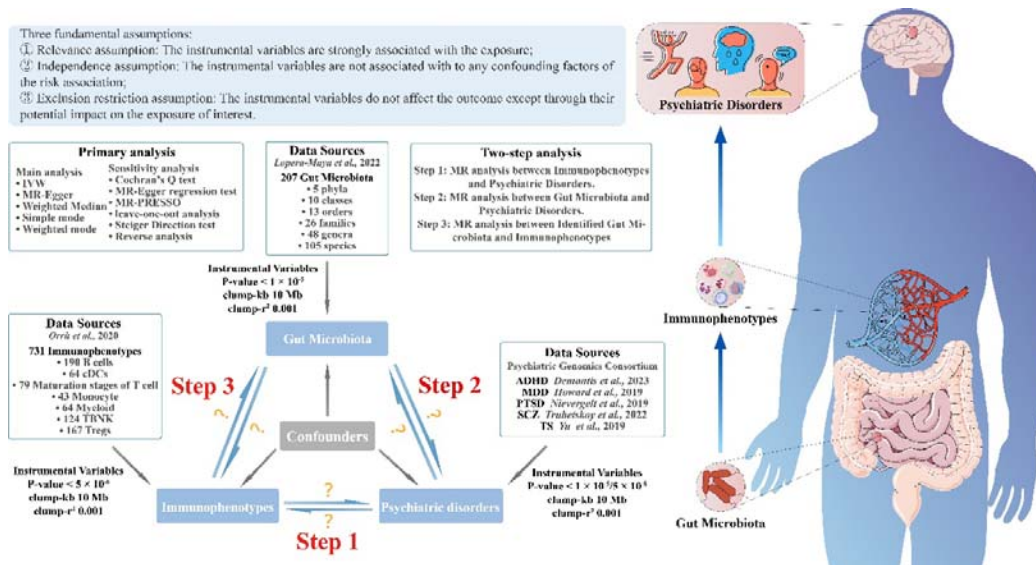

844

845 **Figure 1** The general design of the study.

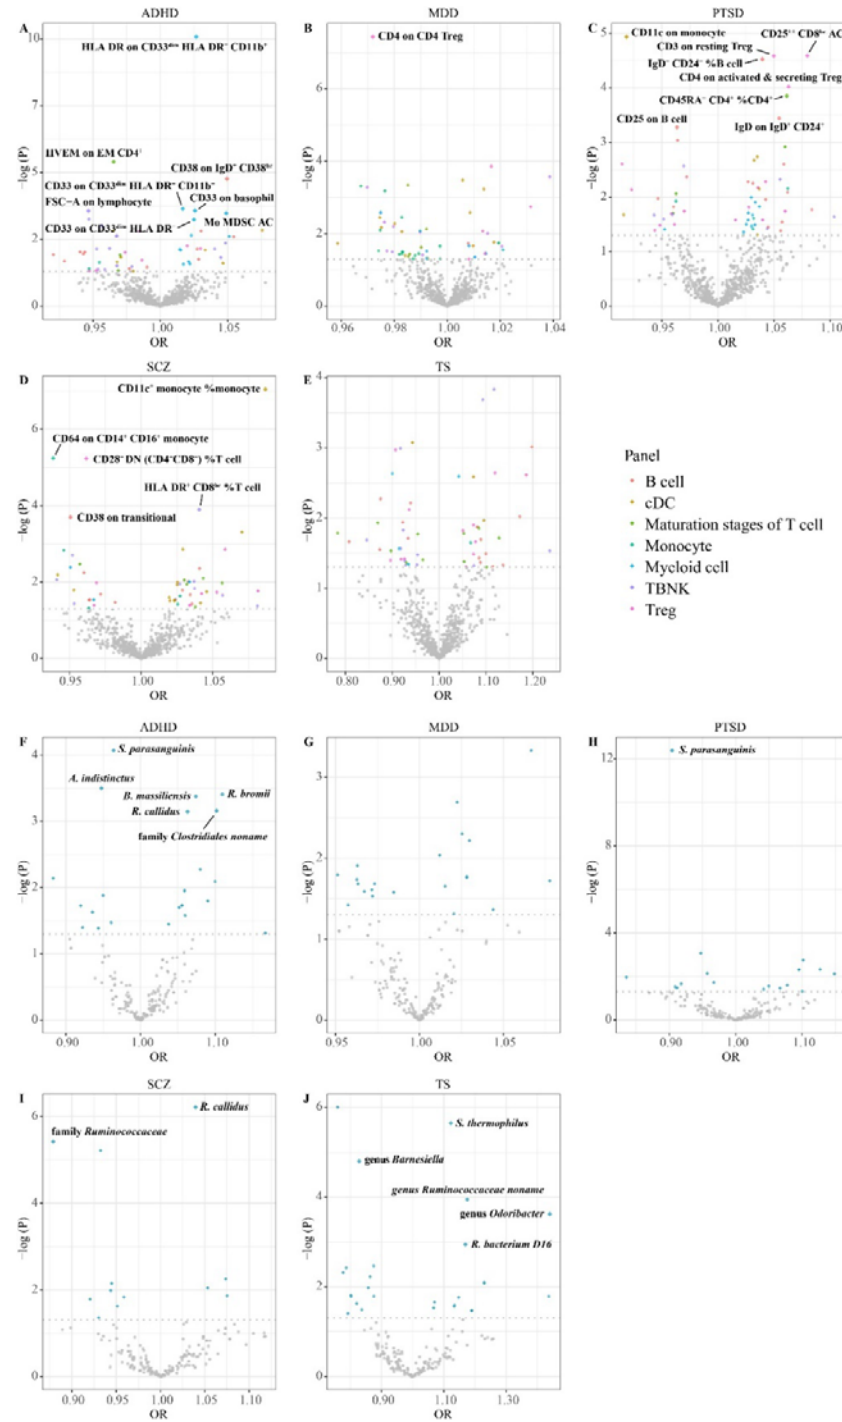

846

847 **Figure 2** Volcano plots showing the effect estimates for each exposure to  
 848 **psychiatric disorders.** A-E demonstrate the causal effect of immunophenotypes on  
 849 **psychiatric disorders.** F-J demonstrate the causal effect of the gut microbiota on  
 850 **psychiatric disorders.**



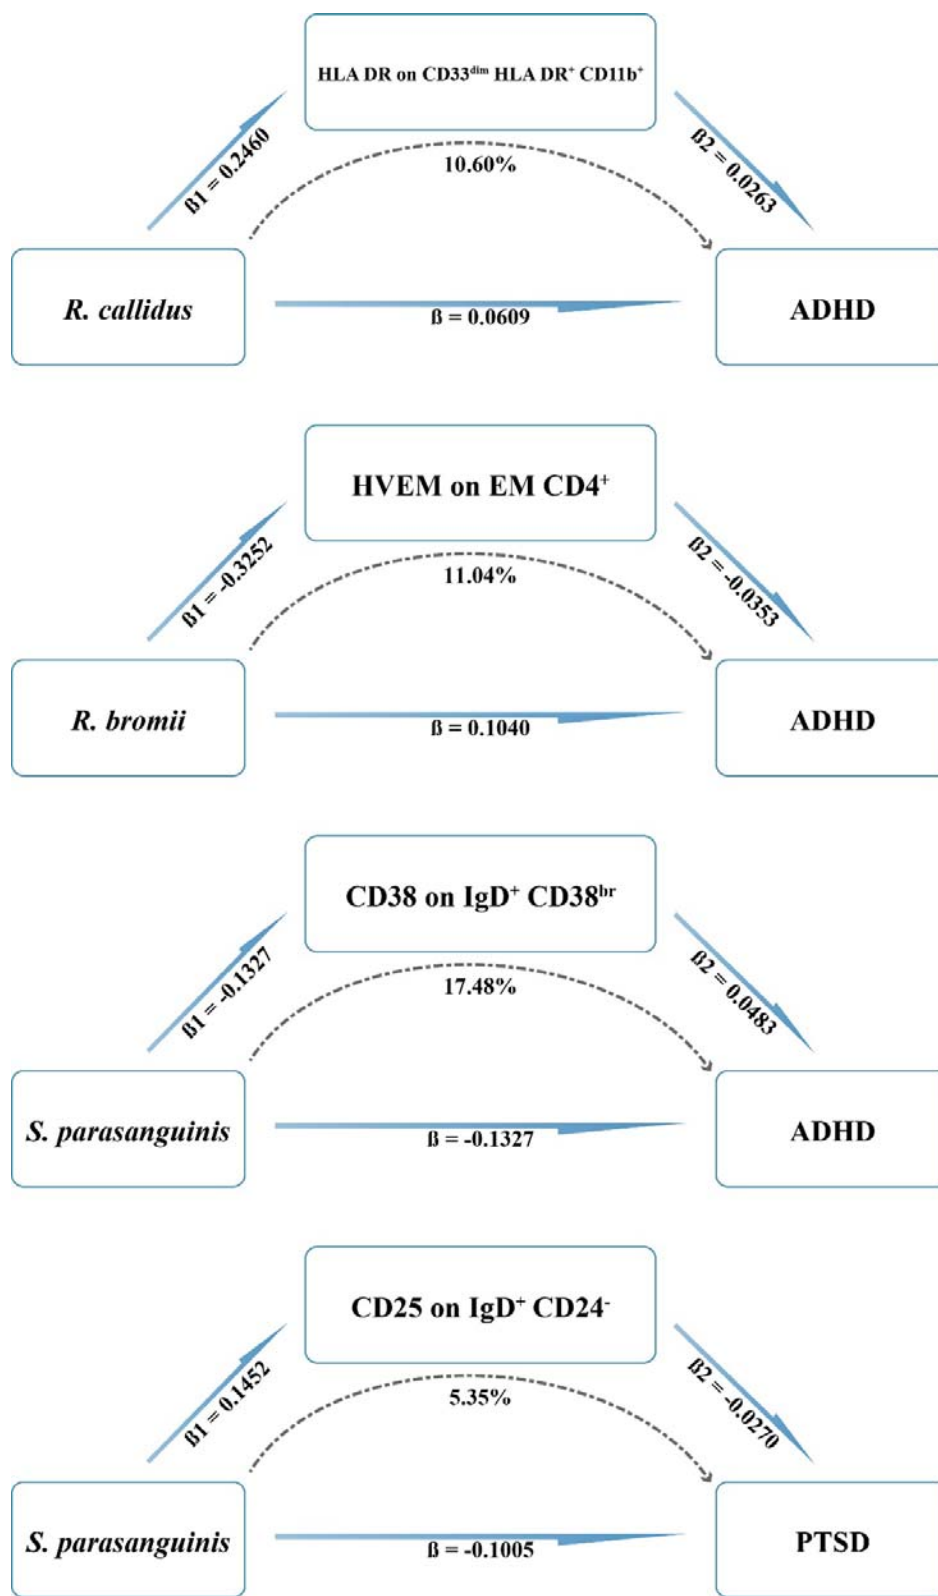

854

855 Figure 4 Immunophenotypes mediate the causal pathways from the gut  
856 microbiota to ADHD and PTSD.



Three fundamental assumptions:

- ① Relevance assumption: The instrumental variables are strongly associated with the exposure;
- ② Independence assumption: The instrumental variables are not associated with to any confounding factors of the risk association;
- ③ Exclusion restriction assumption: The instrumental variables do not affect the outcome except through their potential impact on the exposure of interest.

**Primary analysis**

**Main analysis**

- IVW
- MR-Egger
- Weighted Median
- Simple mode
- Weighted mode

**Sensitivity analysis**

- Cochran's Q test
- MR-Egger regression test
- MR-PRESSO
- leave-one-out analysis
- Steiger Direction test
- Reverse analysis

**Data Sources**  
*Lopera-Maya et al., 2022*

**207 Gut Microbiota**

- 5 phyla
- 10 classes
- 13 orders
- 26 families
- 48 genera
- 105 species

**Two-step analysis**

Step 1: MR analysis between Immunophenotypes and Psychiatric Disorders.

Step 2: MR analysis between Gut Microbiota and Psychiatric Disorders.

Step 3: MR analysis between Identified Gut Microbiota and Immunophenotypes

**Data Sources**  
*Orrù et al., 2020*

**731 Immunophenotypes**

- 190 B cells
- 64 cDCs
- 79 Maturation stages of T cell
- 43 Monocyte
- 64 Myeloid
- 124 TBNK
- 167 Tregs

**Instrumental Variables**

P-value <  $5 \times 10^{-6}$

clump-kb 10 Mb

clump-r<sup>2</sup> 0.001

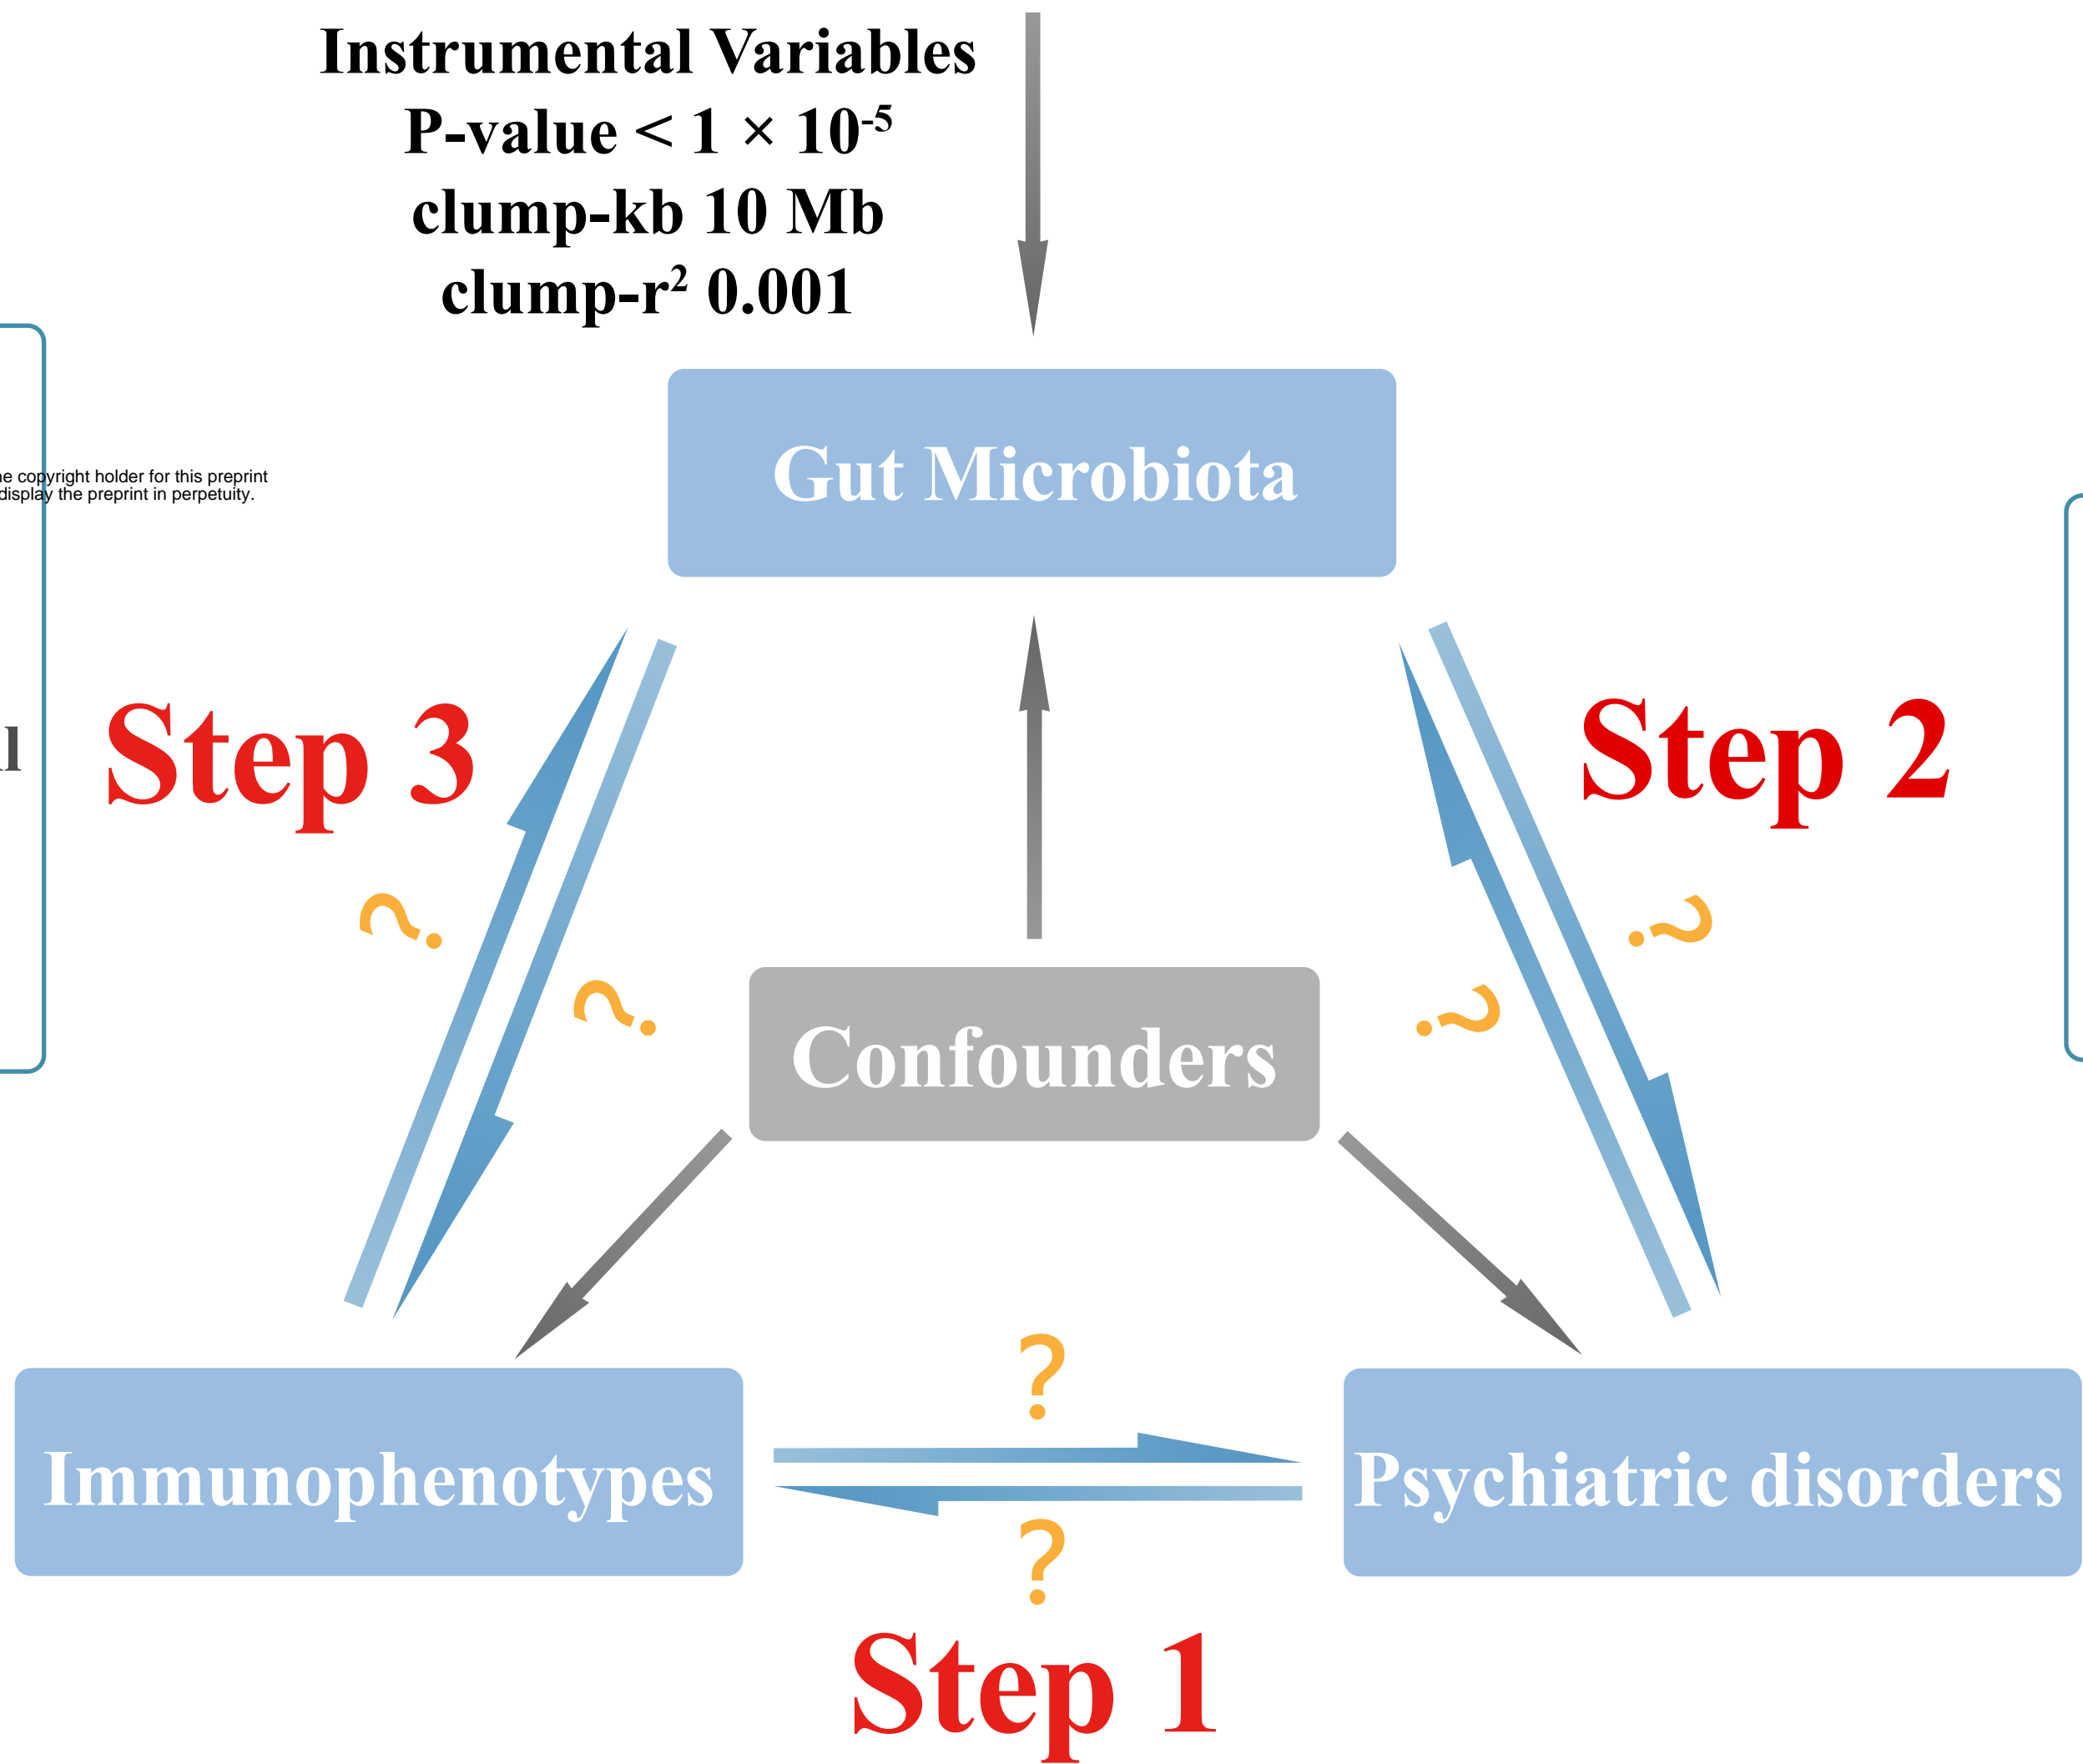

**Data Sources**  
Psychiatric Genomics Consortium

ADHD *Demontis et al., 2023*

MDD *Howard et al., 2019*

PTSD *Nievergelt et al., 2019*

SCZ *Trubetskov et al., 2022*

TS *Yu et al., 2019*

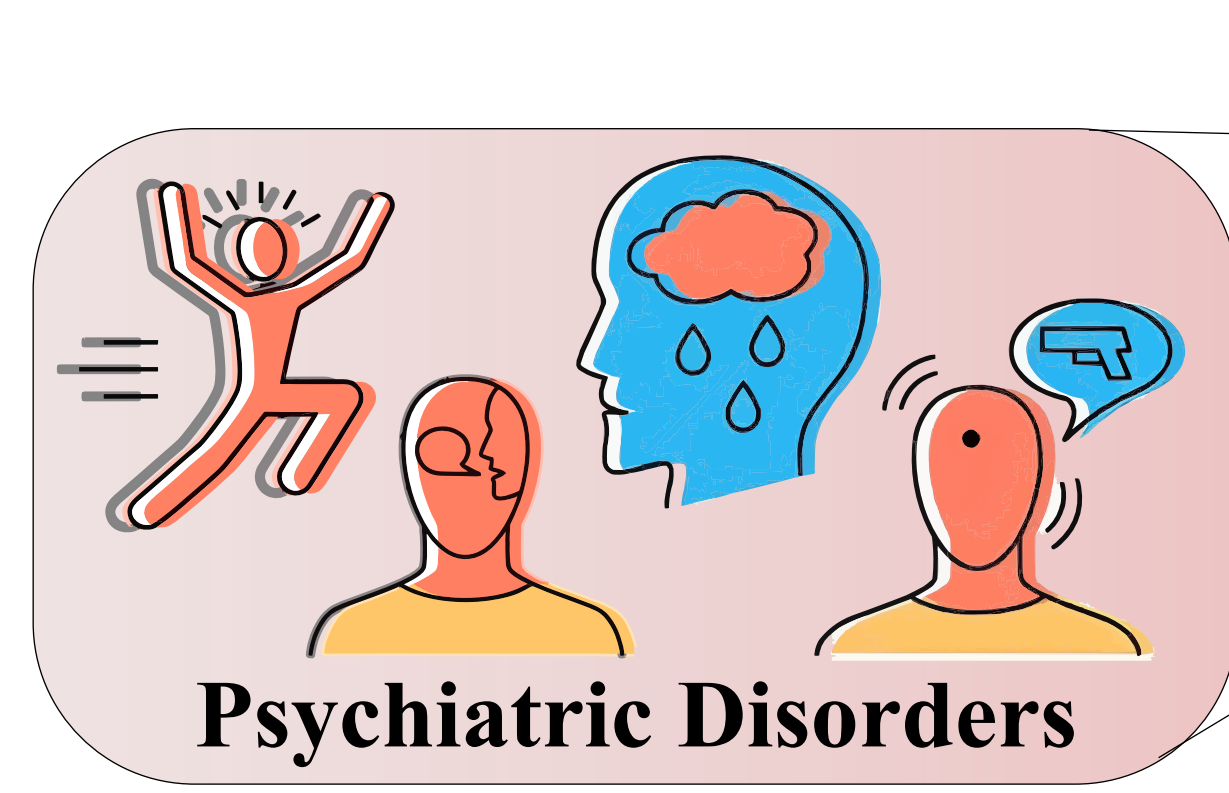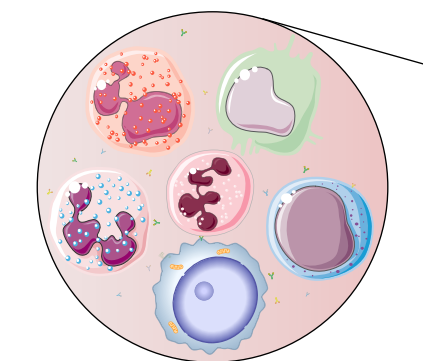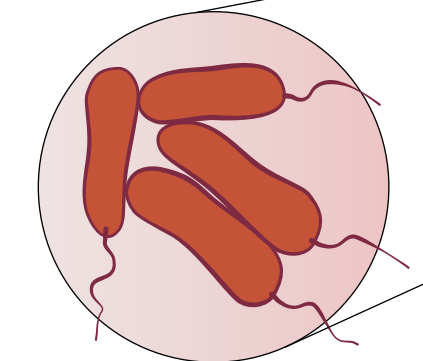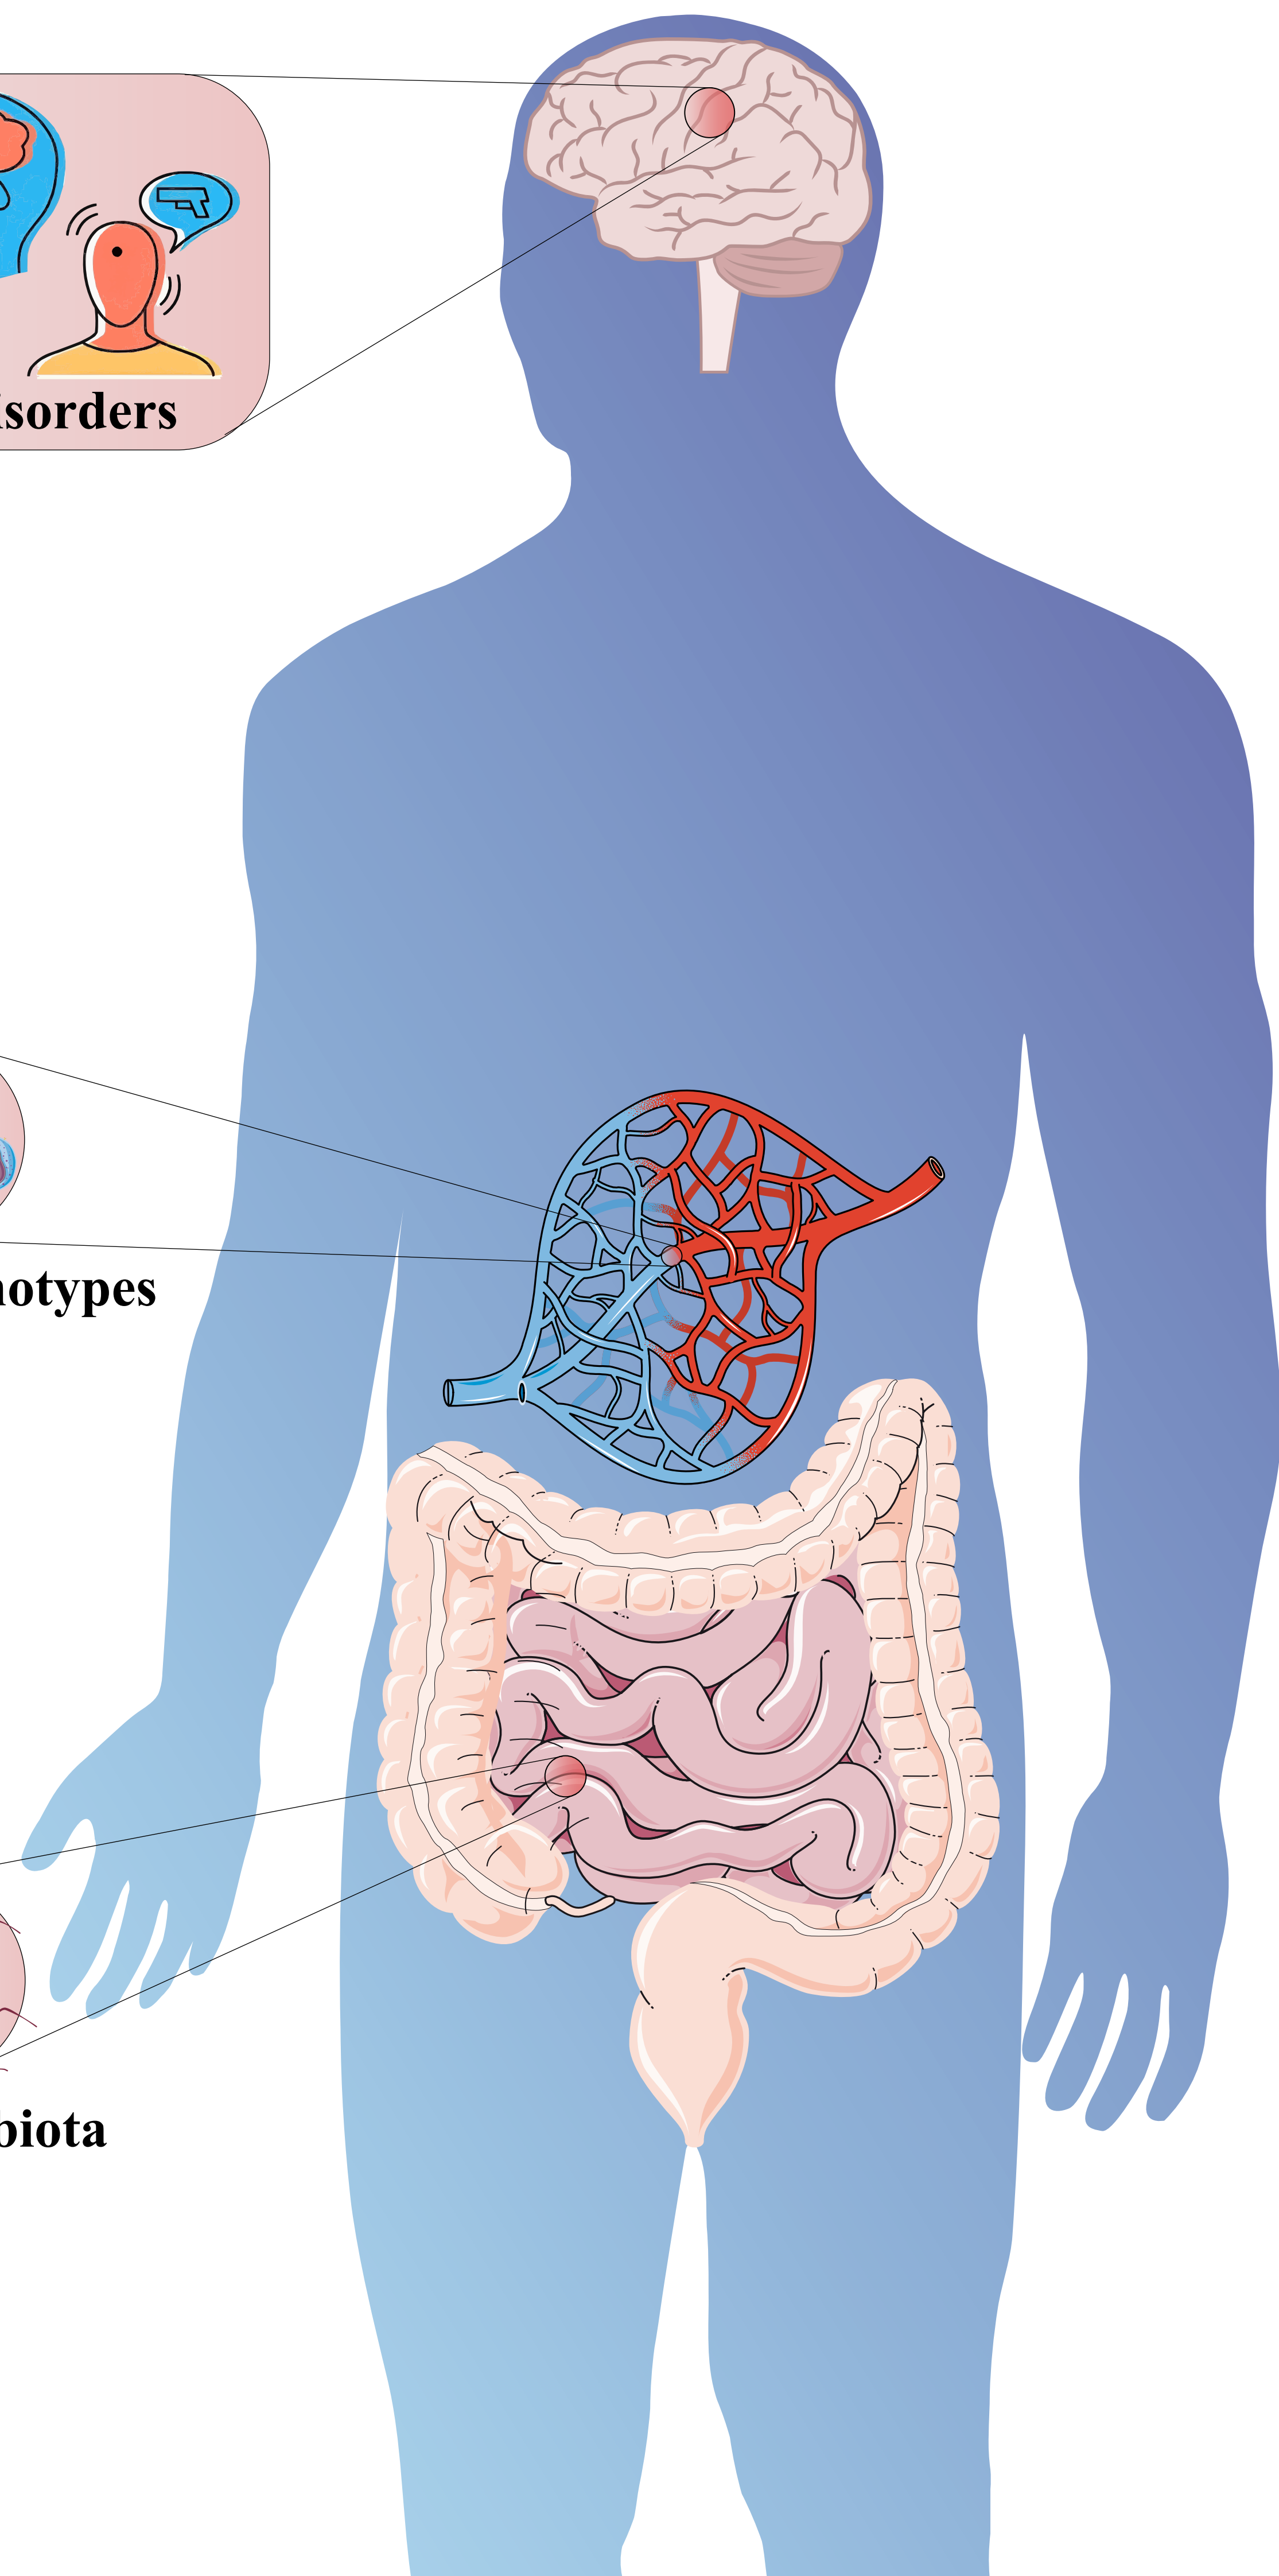

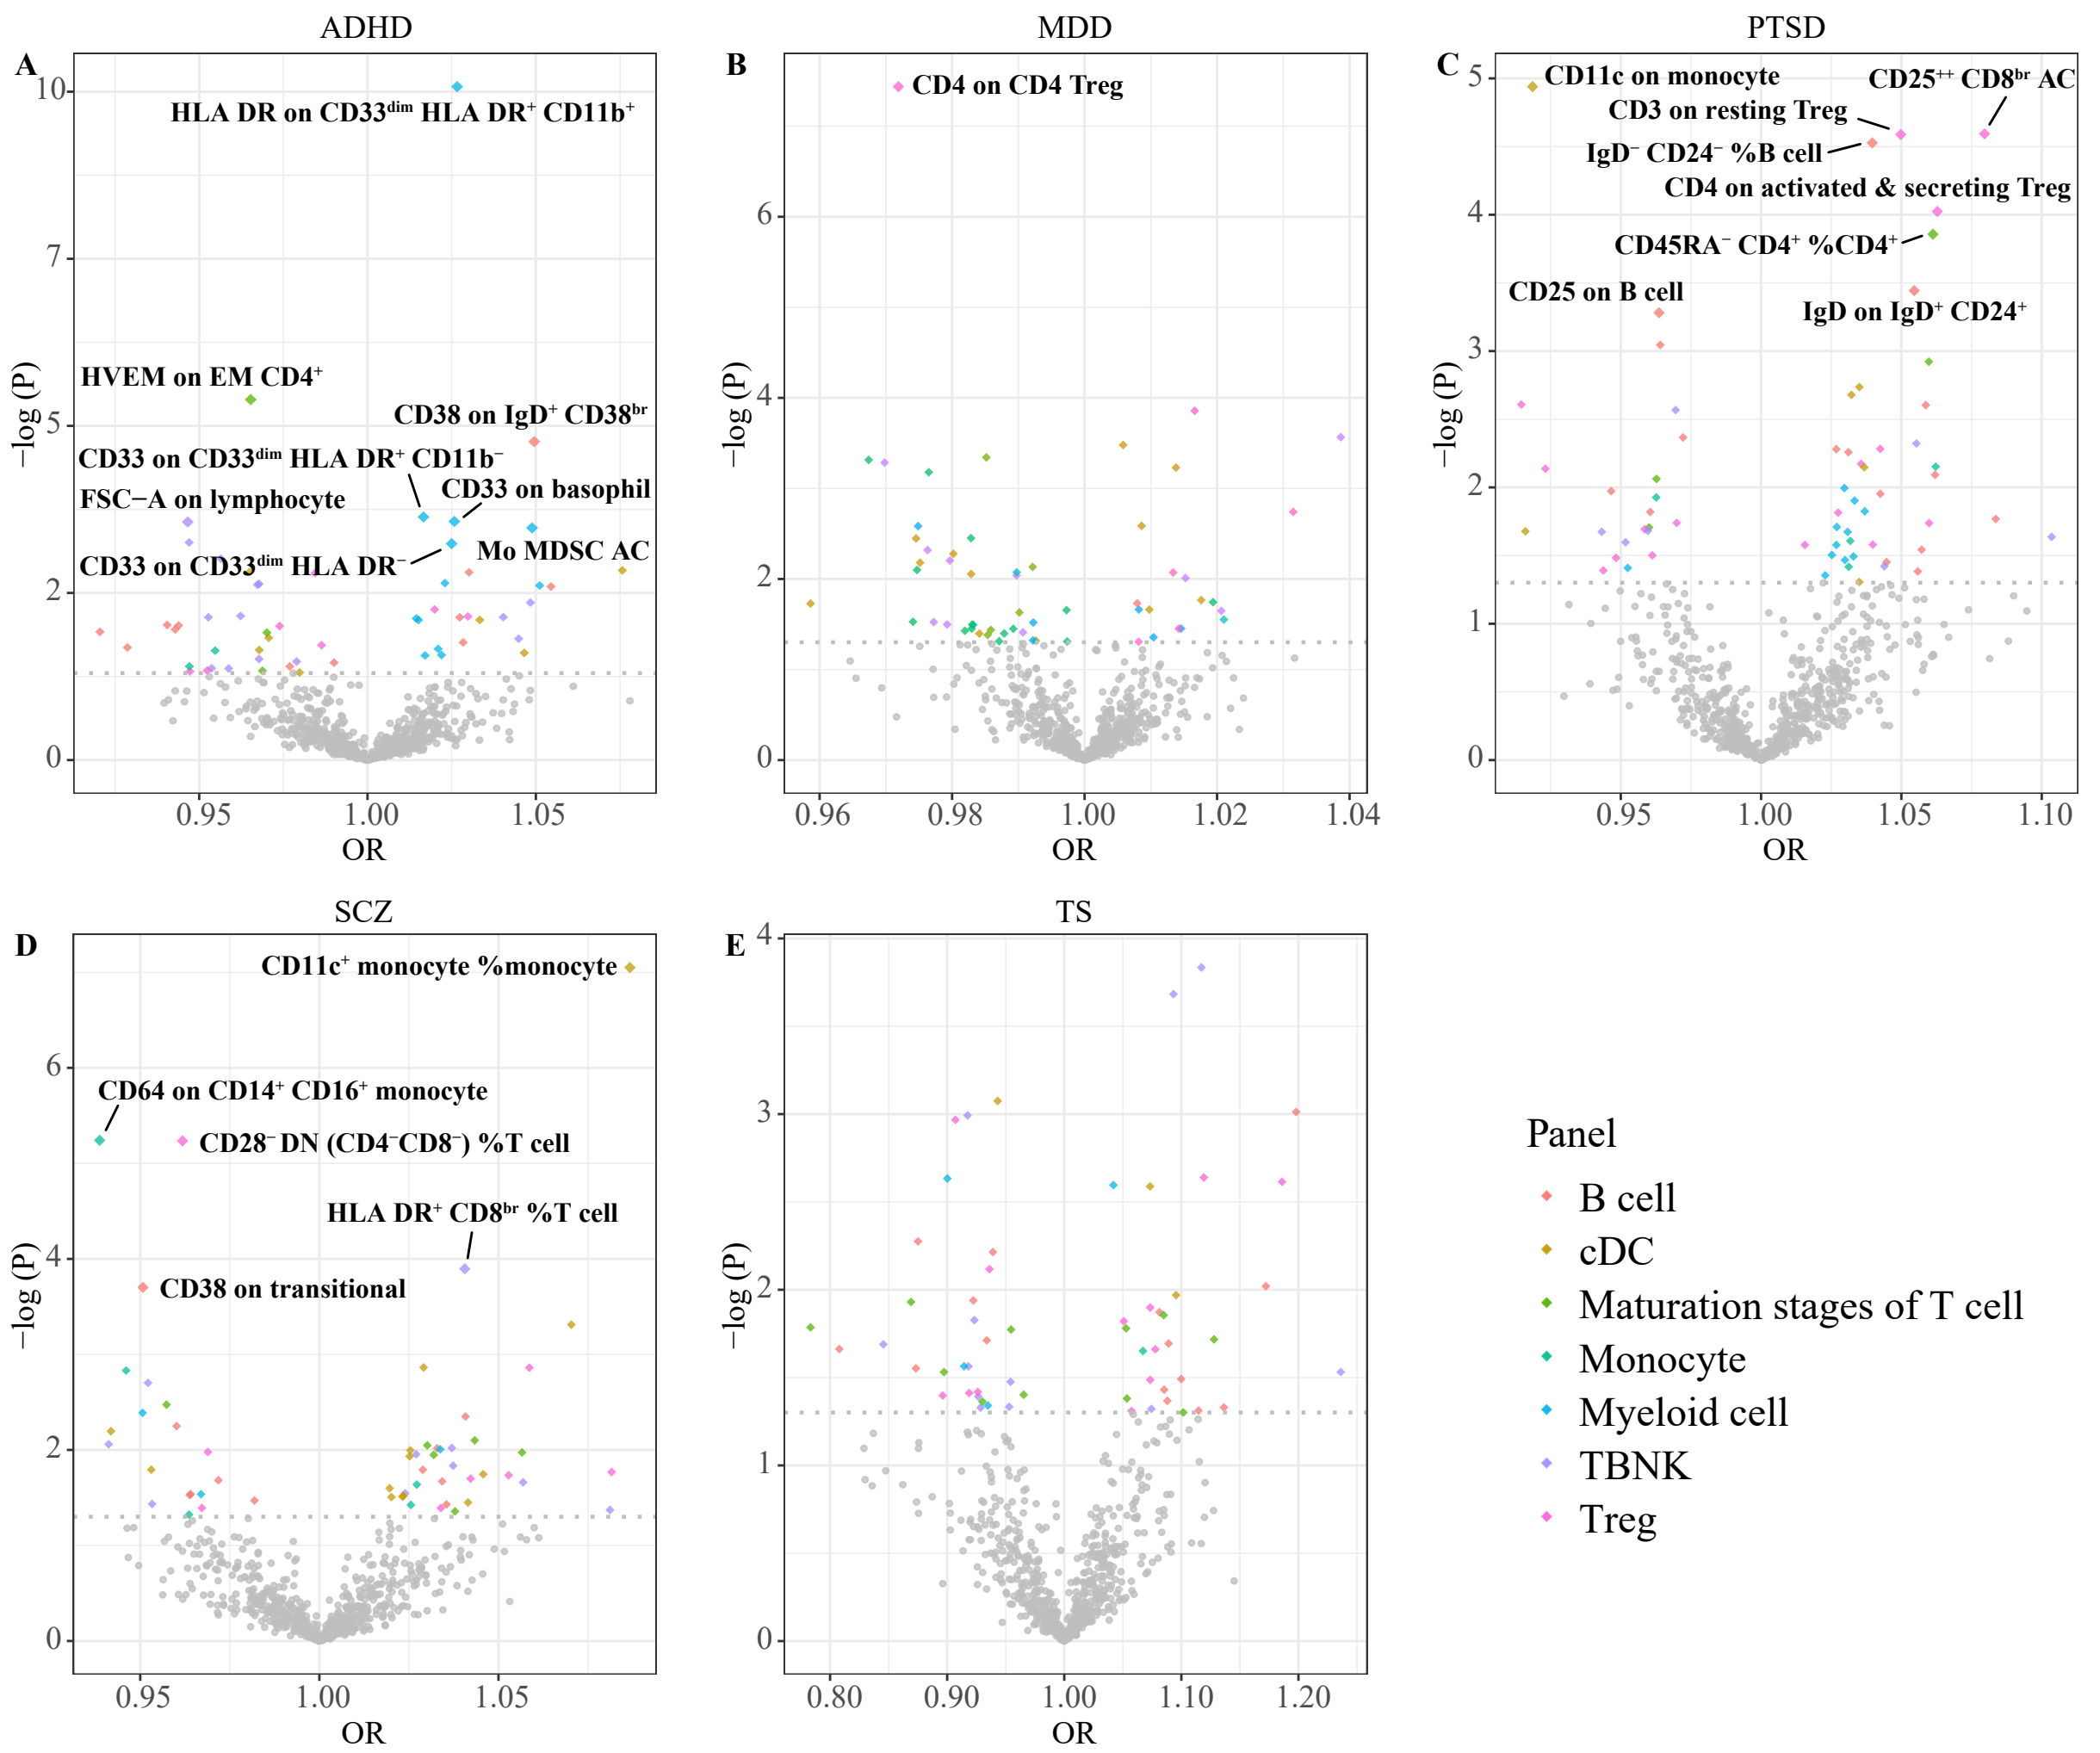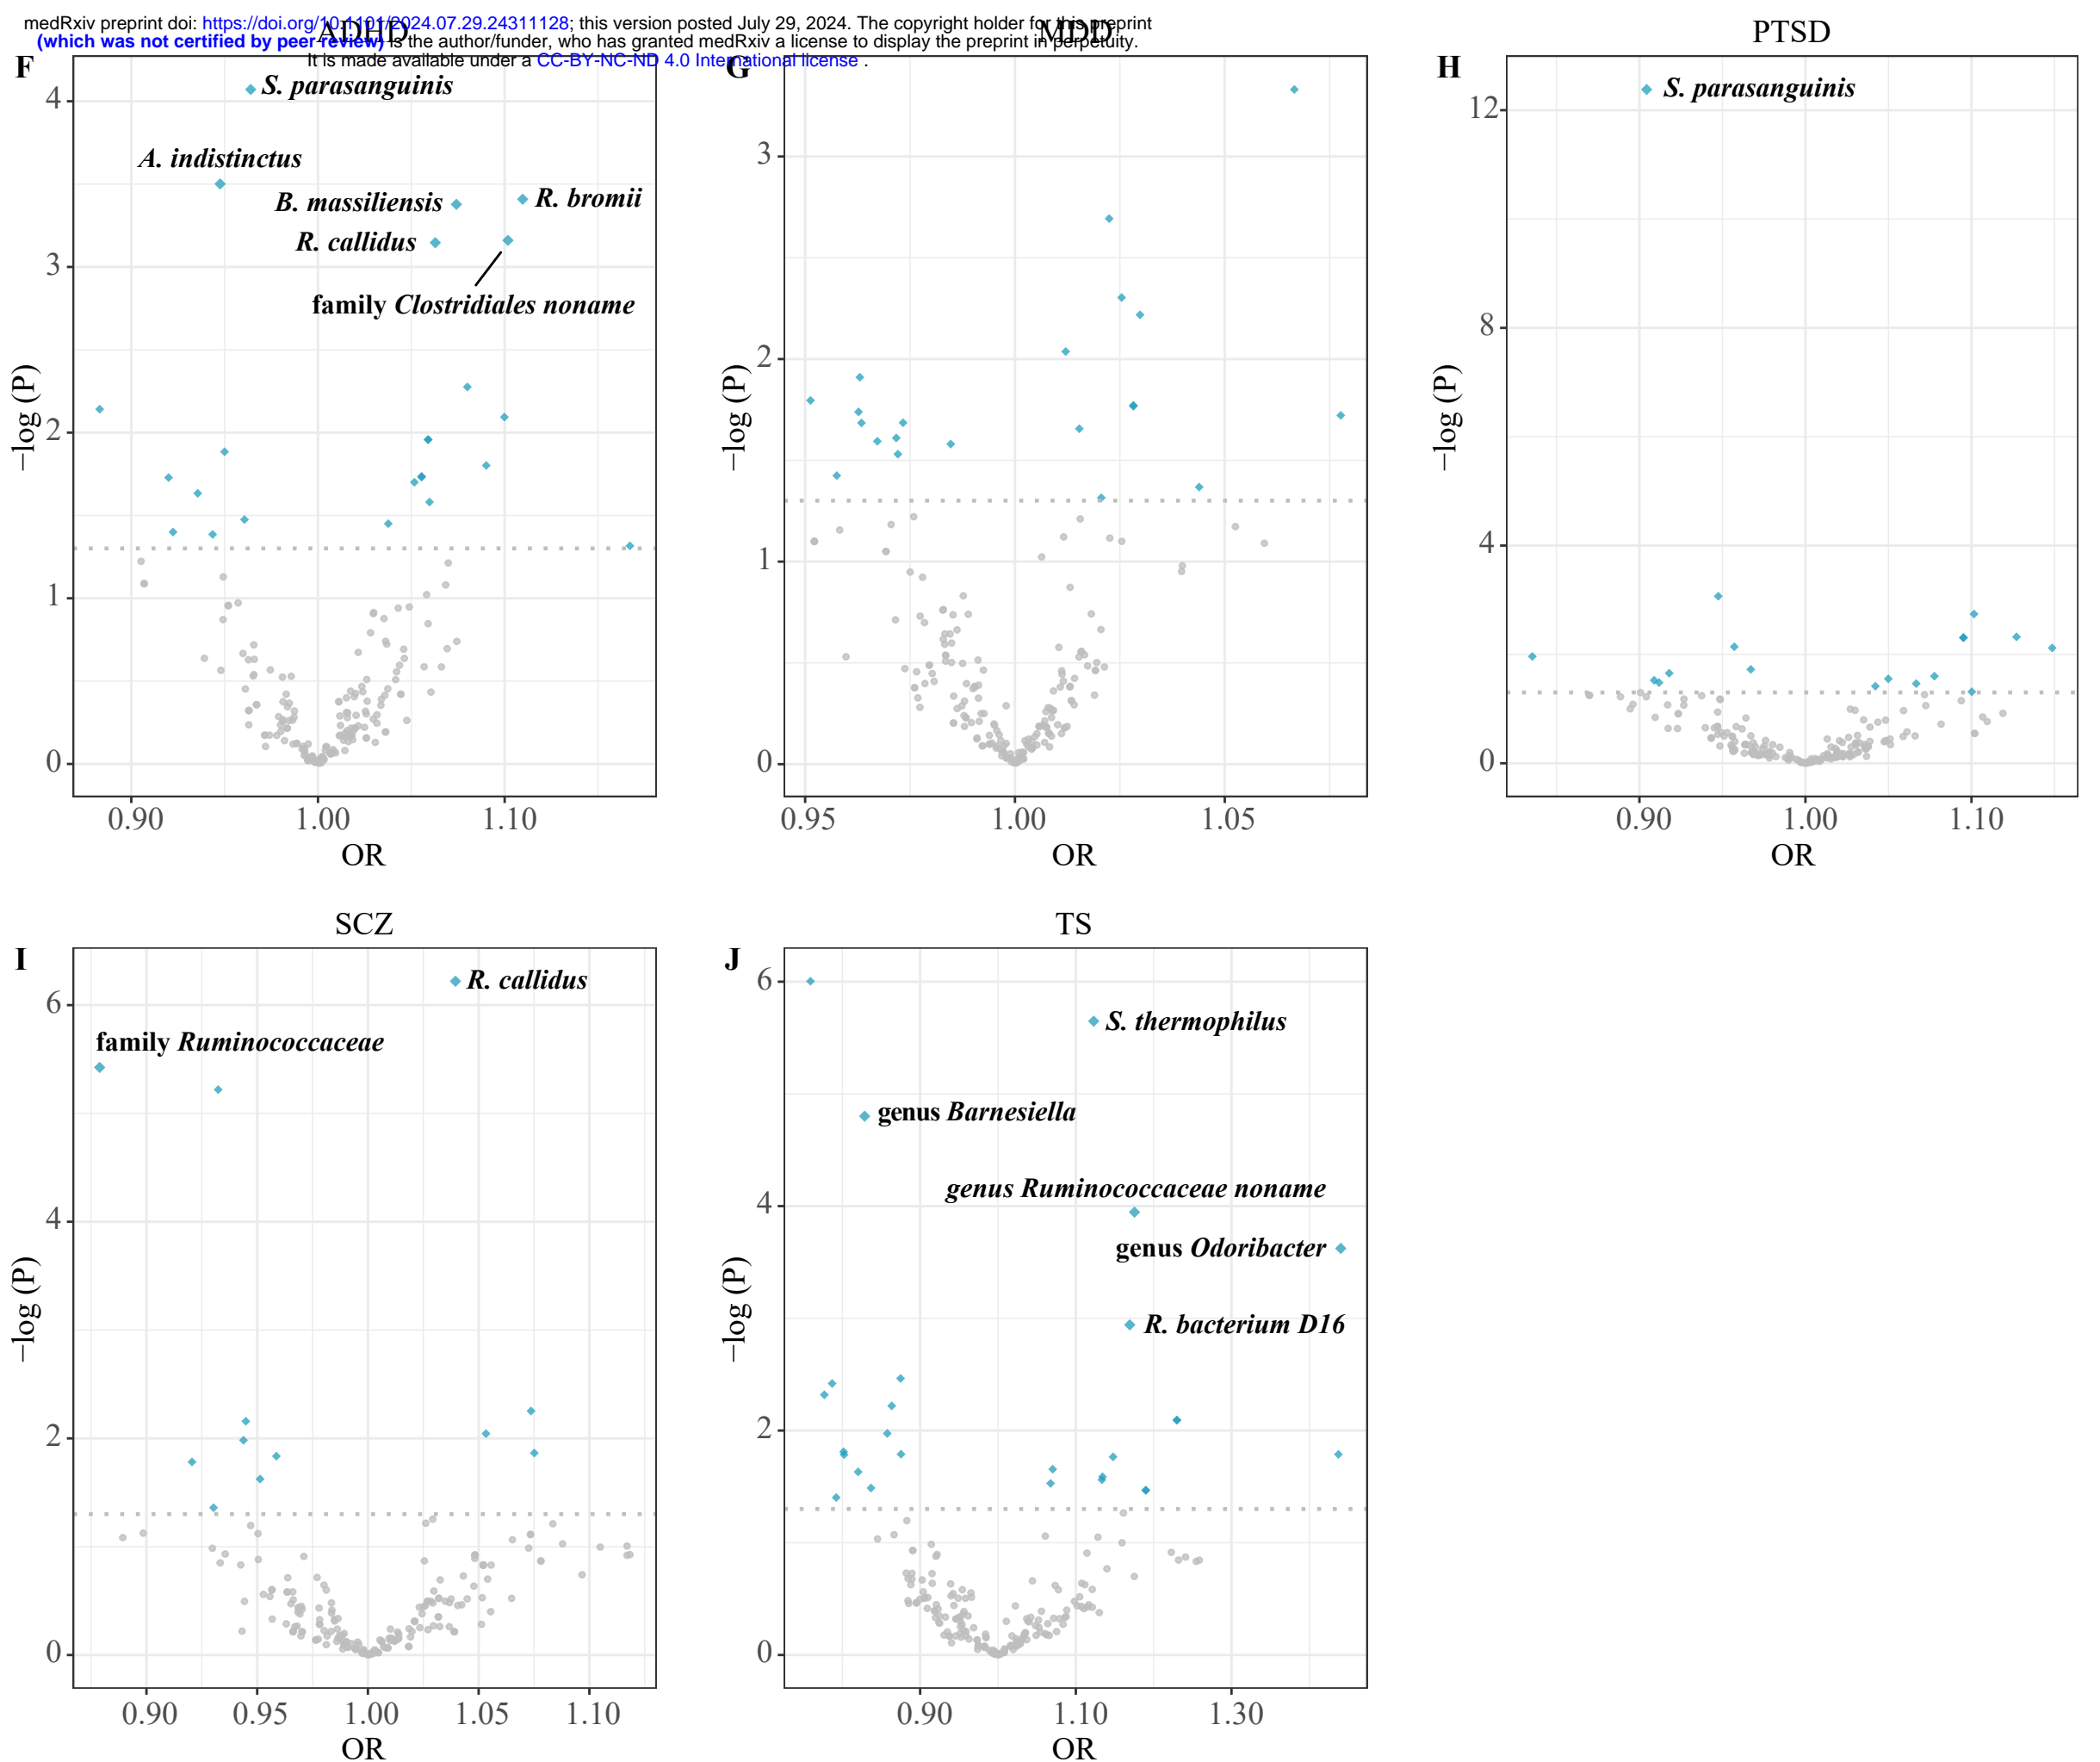

medRxiv preprint doi: <https://doi.org/10.1101/2024.07.29.24311128>; this version posted July 29, 2024. The copyright holder for this preprint (which was not certified by peer review) is the author/funder, who has granted medRxiv a license to display the preprint in perpetuity. It is made available under a [CC-BY-NC-ND 4.0 International license](https://creativecommons.org/licenses/by-nc-nd/4.0/).

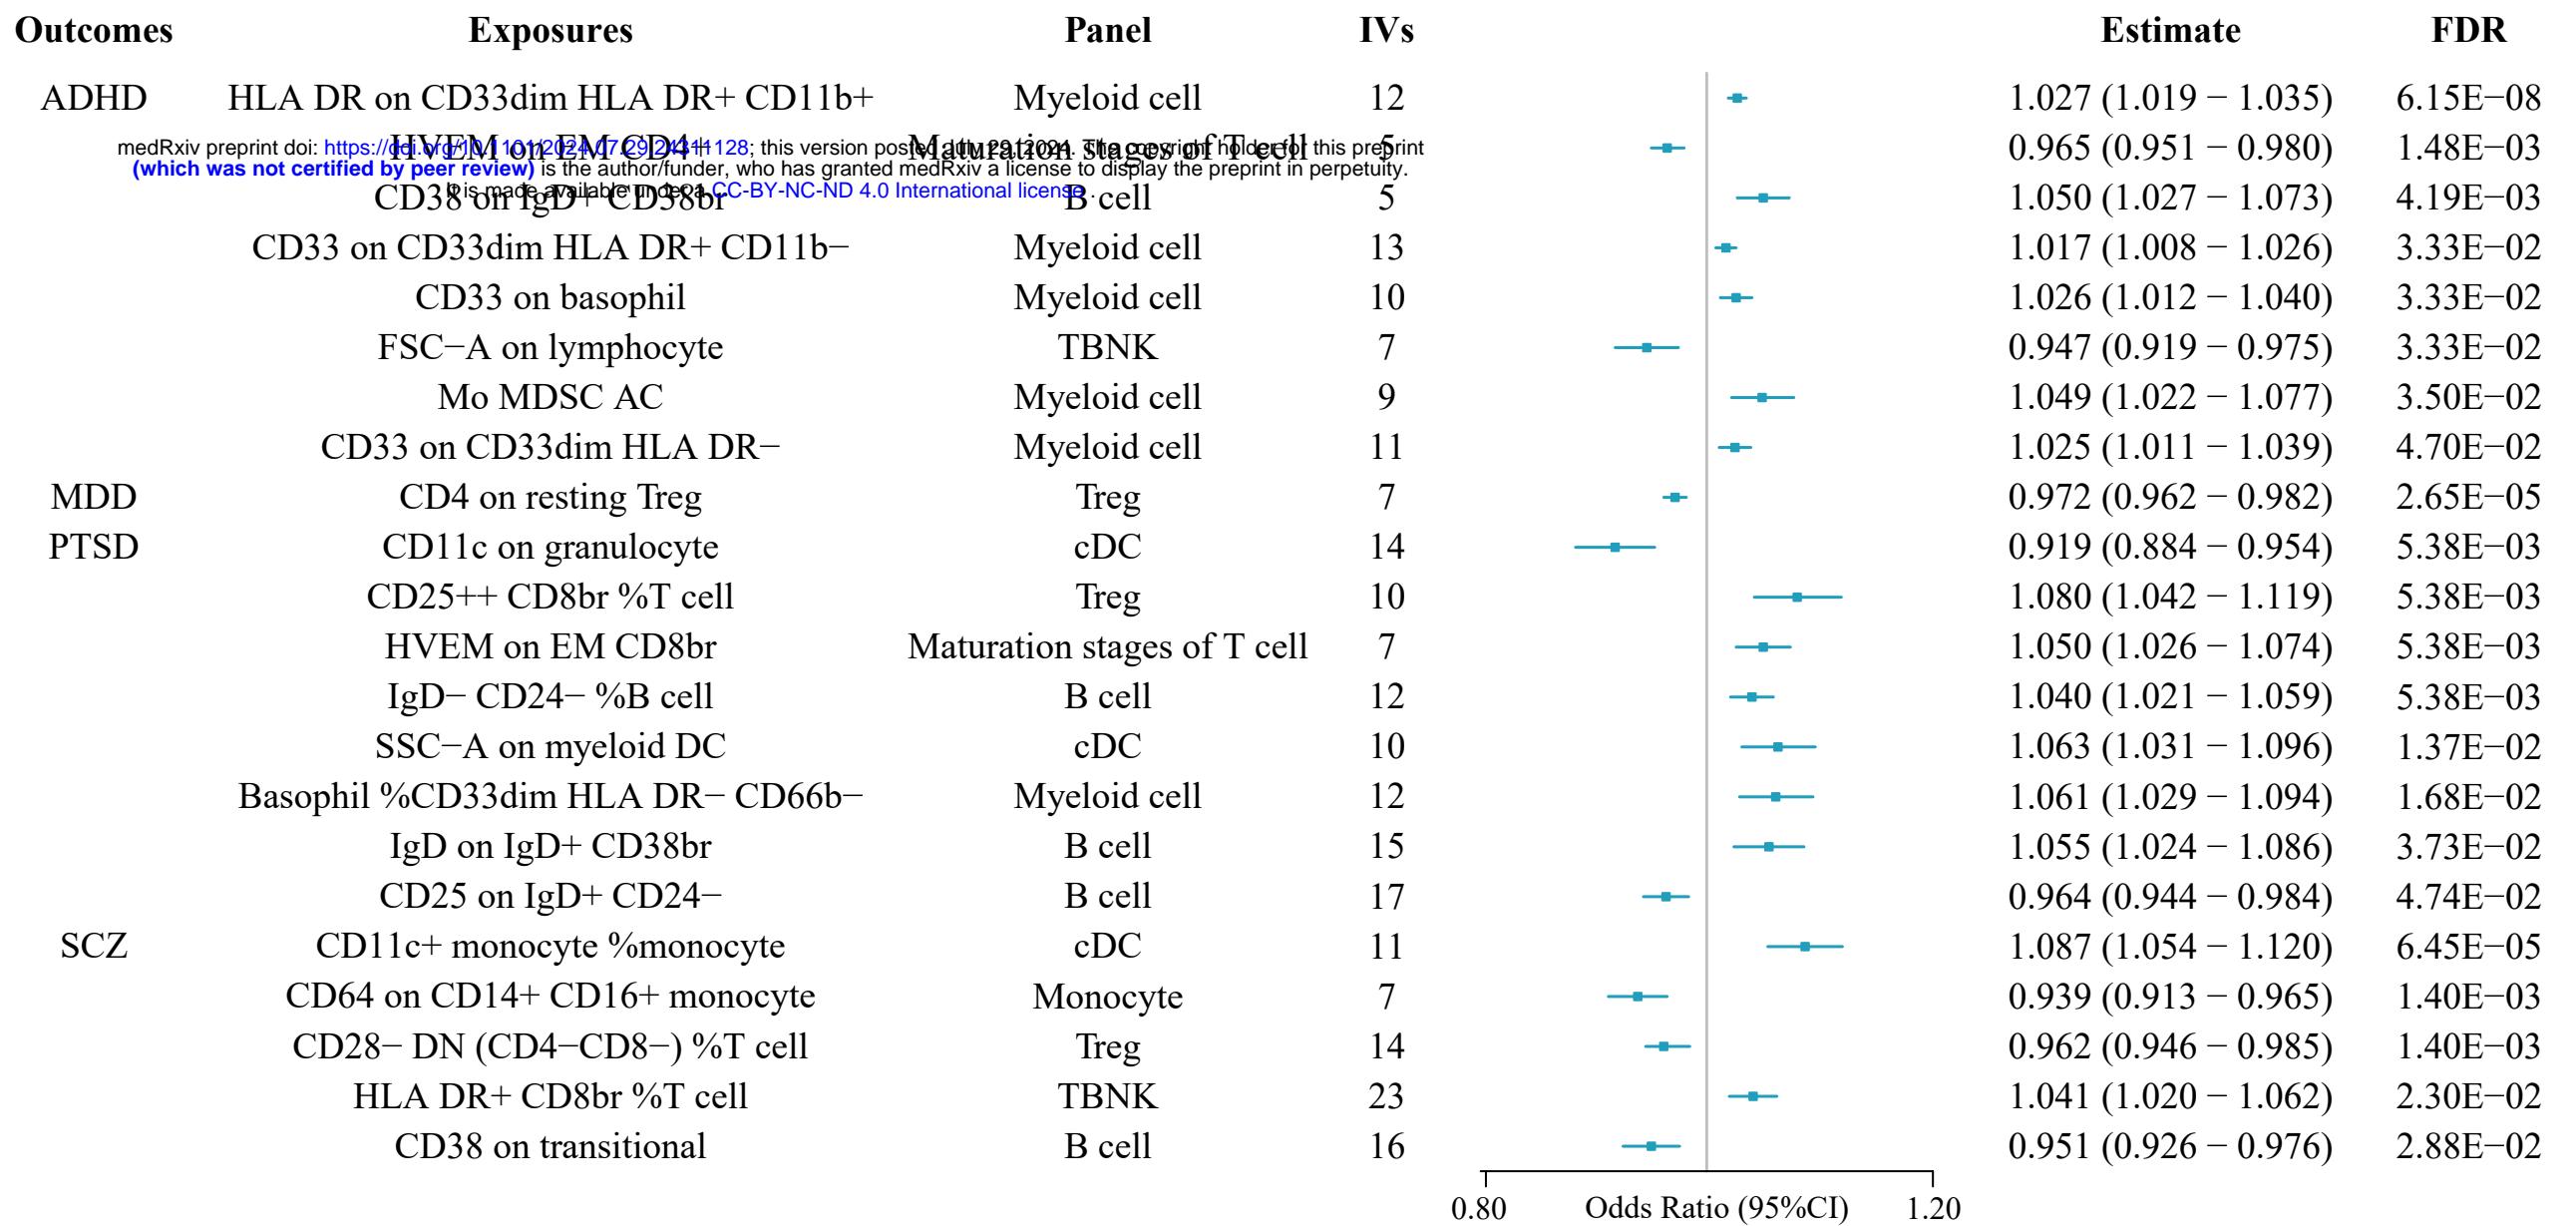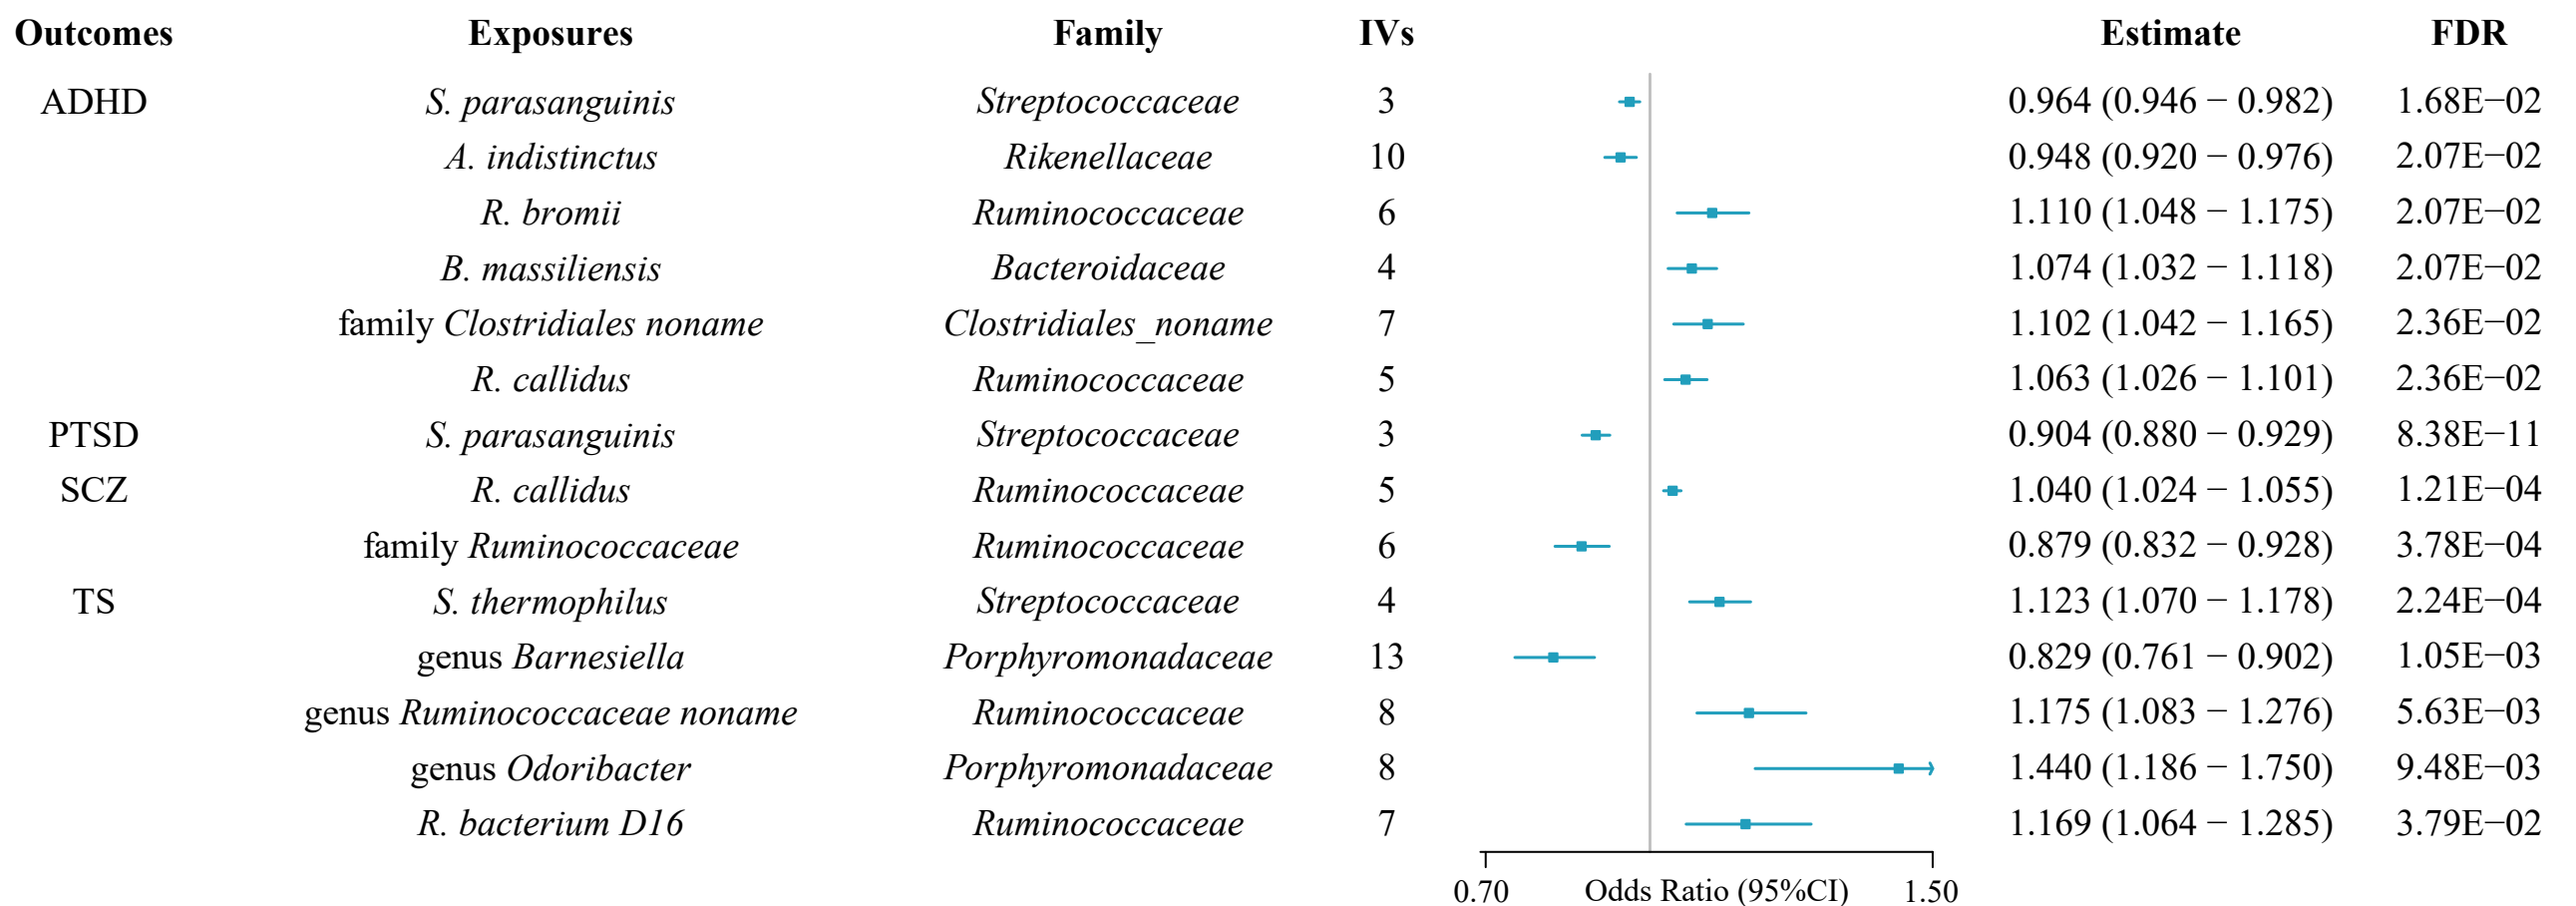

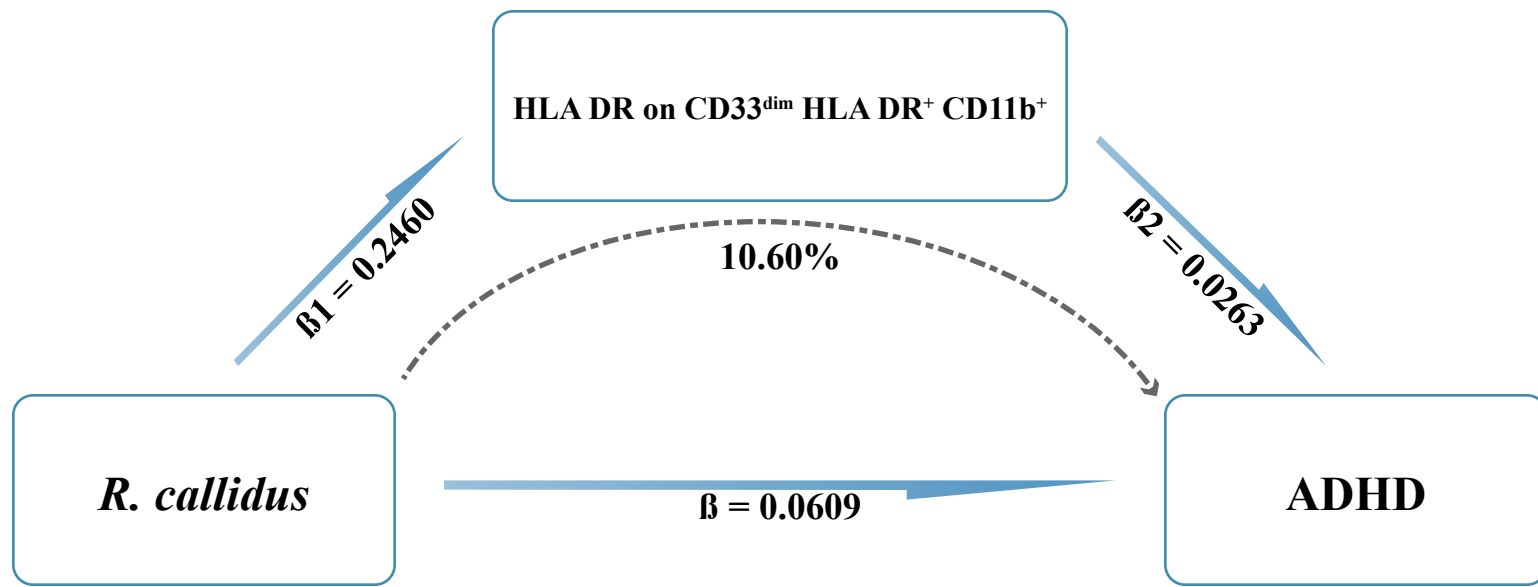

medRxiv preprint doi: <https://doi.org/10.1101/2024.07.29.24311128>; this version posted July 29, 2024. The copyright holder for this preprint (which was not certified by peer review) is the author/funder, who has granted medRxiv a license to display the preprint in perpetuity. It is made available under a [CC-BY-NC-ND 4.0 International license](https://creativecommons.org/licenses/by-nc-nd/4.0/).

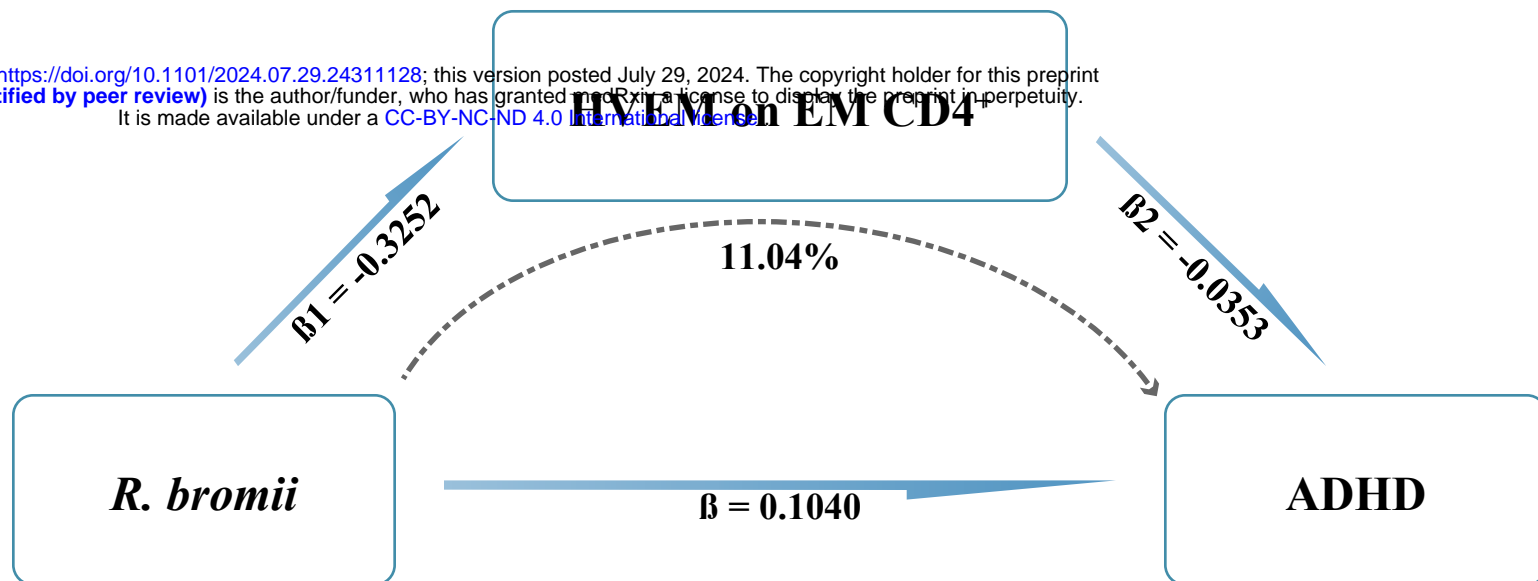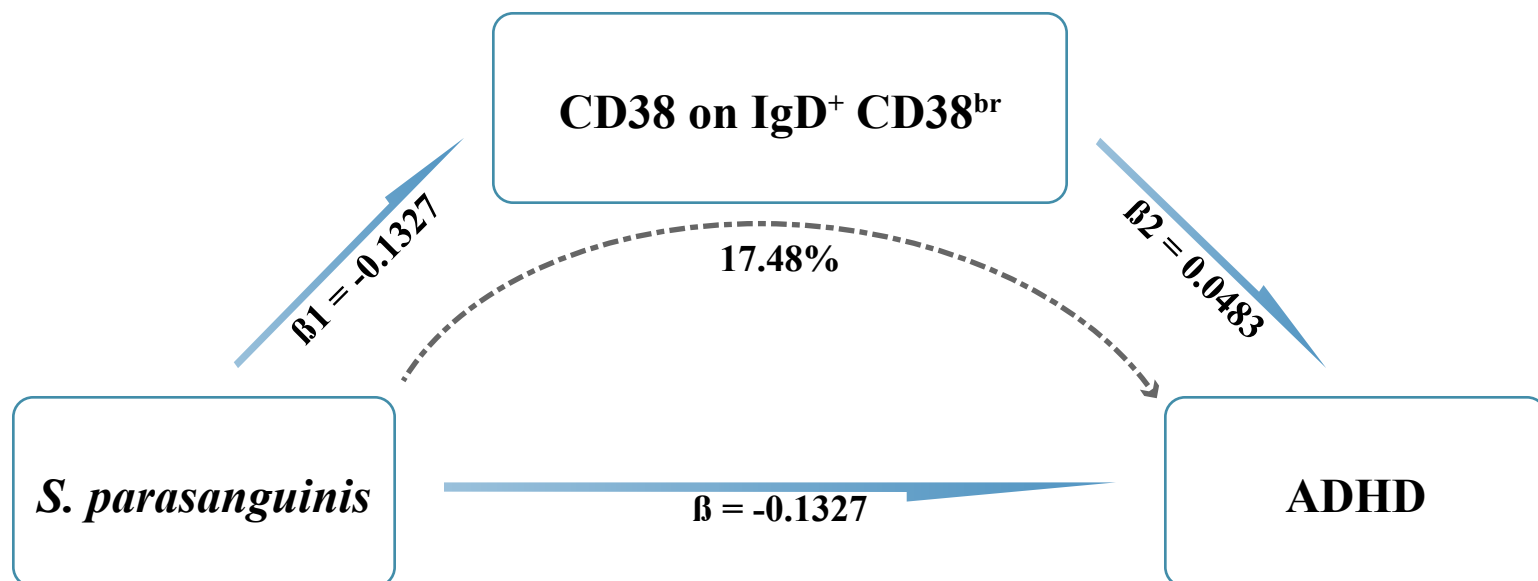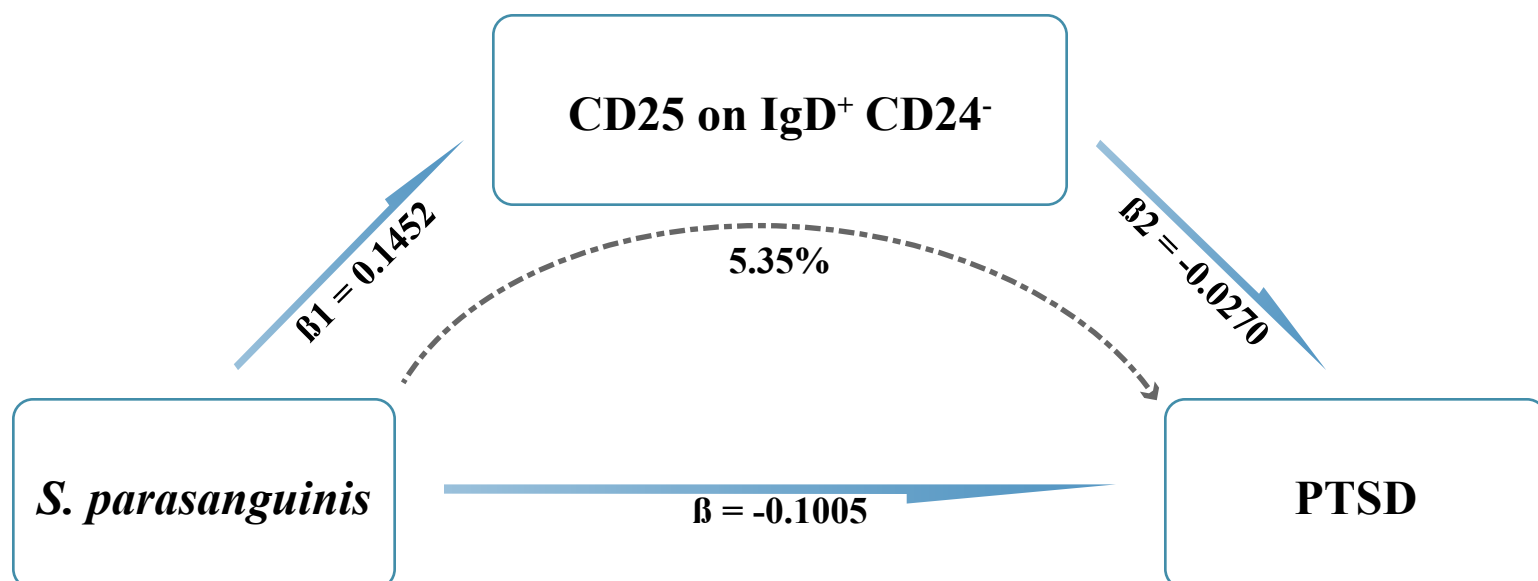

Source: https://medrxiv.org/content/10.1101/2024.07.29.24311128v1.full.pdf
